# Supplementary material for: Technical Note: Evaluation and bias correction of an observations-based global runoff dataset using historical streamflow observations from small tropical catchments in the Philippines
Source: Copernicus journal article supplement (doi:10.5194/hess-2020-26), 2020-02-24

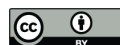

## Technical Note: Evaluation and bias correction of an observations-based global runoff dataset using historical streamflow observations from small tropical catchments in the Philippines

Daniel E. Ibarra<sup>1,2</sup>, Carlos Primo C. David<sup>3</sup>, Pamela Louise M. Tolentino<sup>3</sup>

<sup>1</sup> Department of Earth and Planetary Science, University of California, Berkeley, California 94720 USA

<sup>2</sup> Institute at Brown for Environment and Society and the Department of Earth, Environmental and Planetary Science, Brown University, Providence, Rhode Island 02912 USA

<sup>3</sup> National Institute of Geological Sciences, University of the Philippines, Diliman, Quezon City, Philippines 1101

Correspondence to: Daniel E. Ibarra ([dibarra@berkeley.edu](mailto:dibarra@berkeley.edu)) and Carlos Primo C. David ([cpdavid@nigs.upd.edu.ph](mailto:cpdavid@nigs.upd.edu.ph))

### Abstract

The predictability of freshwater availability is one of the most important issues facing the world's population. Even in relatively wet tropical regions, seasonal fluctuations in the water cycle complicate the consistent and reliable supply of water to urban, industrial and agricultural demands. Importantly, historic streamflow monitoring datasets are crucial in assessing our ability to model and subsequently plan for future hydrologic changes. In this technical note we evaluate a new global product of monthly runoff (GRUN\_v1; Ghiggi et al., 2019) using small tropical catchments in the Philippines. This observations-based monthly runoff product is evaluated using archived monthly streamflow data from 55 catchments with at least 10 years of data, extending back to 1946 in some cases. These catchments are completely independent of the GRUN gridded product as no catchments in the Philippines were of sufficient size to fulfil the original filtering criteria and databases of these data were either not digitized or difficult to compile. Using monthly runoff observations from catchments with more than 10 years of data between 1946 and 2014, we demonstrate across all observations significant but weak correlation ( $r^2 = 0.372$ ) and skilful prediction (Volumetric Efficiency = 0.363 and log(Nash-Sutcliffe Efficiency) = 0.453) between the predicted values and the observations. At a regional scale we demonstrate that GRUN performs best among catchments located in Climate Types III (no pronounced maximum rainfall with short dry season) and IV (evenly distributed rainfall, no dry season). We also find a weak negative correlation between volumetric efficiency and catchment area, and a positive correlation between volumetric efficiency and mean observed runoff. Further, analysis of individual rivers demonstrates systematic biases (over and under) in baseflow during the dry season, and under-prediction of peak flow during some wet months among most catchments. These results demonstrate the potential utility of GRUN and future data products of this nature with due consideration and correction of systematic biases at the individual basin level to: 1) assess trends in

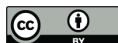

regional scale runoff over the past century, 2) validate hydrologic models for un-monitored catchments in the Philippines, and 3) assess the impact of hydrometeorological phenomenon to seasonal water supply in this wet but drought prone archipelago. Finally, to correct for underprediction during wet months we perform a log-transform bias correction which greatly improves the nationwide Root Mean Square Error between GRUN and the observations by an order of magnitude (2.648 vs. 0.292 mm/day). This technical note demonstrates the importance of performing such corrections when accounting for the proportional contribution of catchments from smaller catchments in tropical land such as the Philippines to global tabulations of discharge.

## 1 Introduction

The global water crisis is considered as one of the three biggest global issues that we need to contend with, affecting an estimated two-thirds of the world's population (Kummu et al., 2016; WEF, 2018). Among the sources of freshwater, the most important compartment in terms of utility is surface water flow, which is the primary resource for irrigation, industrial use and for bulk domestic water supply for many large cities. Along with the purpose of flood mitigation during extreme weather events, monitoring streamflow is a vital activity that many nations conduct with various levels of coverage. Long term streamflow datasets prove useful in resource management and infrastructure planning (e.g., Evaristo and McDonnell, 2019). Such data is even more critical in areas that rely on run-of-the-river supply and do not utilize storage structures such as dams and impoundments. Further, a robust, long term dataset is crucial in the face of increased variability in stream discharge due to land use change, increased occurrence of mesoscale disturbances and climate change (e.g., Abon et al., 2016; David, et al., 2017; Kumar et al., 2018).

There is a disparity in the availability of long-term gauged rivers datasets between continental areas and smaller island nations. This in the face of the latter having an invariably more dynamic hydrometeorologic system owing to the size of their catchment and proximity to the ocean (e.g., Abon et al., 2011; Paronda et al., 2019). Furthermore, in the case of tropical island nations these are where the impact of climate change in the hydrologic cycle could be observed the most (Nurse et al., 2014). Thus, the Philippines offers a unique example where manual stream gauging programs have started in 1904 and, while spotty at times, have continued on to today. In this work we analyse data since 1946. This island nation on the western side of the Pacific Ocean shows a very dynamic hydrologic system as affected by tropical cyclones, seasonal monsoon rains, sub-decadal cycles such as the El Nino Southern Oscillation (ENSO) and overlaid on top of all these are the hydrologic changes caused by climate change (Abon et al., 2016; David, et al., 2017; Kumar et al., 2018).

In the absence of long-term streamflow datasets, several researchers have compiled datasets worldwide which are used to extrapolate streamflow in non-gauged areas (Maybeck et al., 2013, Gudmundsson et al., 2018, Do et al., 2018). Several global hydrological models have also been created to project variations in streamflow and extend present-day measurements to the future (ref). The latest contribution to modelled global streamflow product is the Global Runoff Reconstruction (GRUN) (Ghiggi et al., 2019). GRUN is a global gridded reconstruction of monthly runoff at 0.5 degree

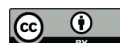

(~50km by 50km) spatial resolution. It uses global streamflow data from 718 large river basins that is used to train a machine learning algorithm that ~~would be able to take~~ precipitation and temperature data to predict monthly global runoff for the period 1902-2014.

This technical note evaluates the accuracy of the GRUN dataset (GRUN\_v1) as applied to the hydrodynamically-active smaller river basins in the Philippines. Additionally, it explores the possible hydrologic parameters that may need to be considered and/or optimized such that global datasets may be able to model runoff in smaller, ungauged basins more accurately.

## 2 Dataset and Methods

### 2.1 GRUN observations-based global gridded (~~0.5°x0.5°~~) runoff dataset

GRUN is a recently published global reconstruction of monthly runoff time series spanning 1902 to 2014 created using a machine learning algorithm based on training temperature and precipitation fields from the Global Soil Wetness Project Phase 3 (GSWP3; Kim et al., 2017; <http://hydro.iis.u-tokyo.ac.jp/GSWP3/index.html>) using the Global Streamflow Indices and Metadata Archive (GISM) (Ghiggi et al., 2019). In this contribution we analyze GRUN\_v1 (<https://doi.org/10.3929/ethz-b-000324386>) which was trained on large (> 10,000 km<sup>2</sup>) stations from GISM (Do et al., 2018; Gudmundsson et al., 2018) and validated using 718 large (>50,000 km<sup>2</sup>) monthly river discharge datasets from the Global Runoff Data Centre (GRDC) Reference Dataset ([https://www.bafg.de/GRDC/EN/04\\_spcldtbss/43\\_GRfN/refDataset\\_node.html](https://www.bafg.de/GRDC/EN/04_spcldtbss/43_GRfN/refDataset_node.html)). We refer the reader to Ghiggi et al. (2019) for more information but note that because of the catchment size filtering criteria, none of the GISM and GRDC data from the Philippines was used (*Personal Communications*, G. Ghiggi, 2019). As such, we view our analysis as a completely independent test of the GRUN runoff reconstruction using small tropical catchments.

### 2.2 Historical streamflow observations

In this contribution we analyse monthly ~~observations of~~ discharge from 74 manually observed streamflow stations from three Philippine datasets. The observations span 1946 to 2016, although only data through 2014 are utilized due to the time period included in GRUN\_v1.

#### 2.2.1 Bureau of Research and Standards (BRS) Dataset

The historical discharge data was originally acquired from the Bureau of Research Standards (BRS) under Department of Public Works and Highways (DPWH). The records keeping was transferred to the Bureau of Design, also under DPWH, which continues to record gage data from some rivers up to this date. The degree of accuracy of records were categorized as “excellent”, “good”, “fair”, or “poor” using the following convention: “Excellent” means about 95% of daily discharges are within ±5% difference of the actual gauge height vs height computed from the rating curve; “Good” is within ±10%; and “Fair” is within ±15%; while “Poor” means daily discharges are below the 15% “Fair” accuracy. This is the only

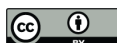

basis of accuracy for this set of data. A majority of the reprocessed BRS data used in this analysis come from Tolentino et al. (2016), however, some of the datasets were subsequently updated using the online archive for this study ([https://apps.dpwh.gov.ph/streams\\_public/station\\_public.aspx](https://apps.dpwh.gov.ph/streams_public/station_public.aspx)).

100

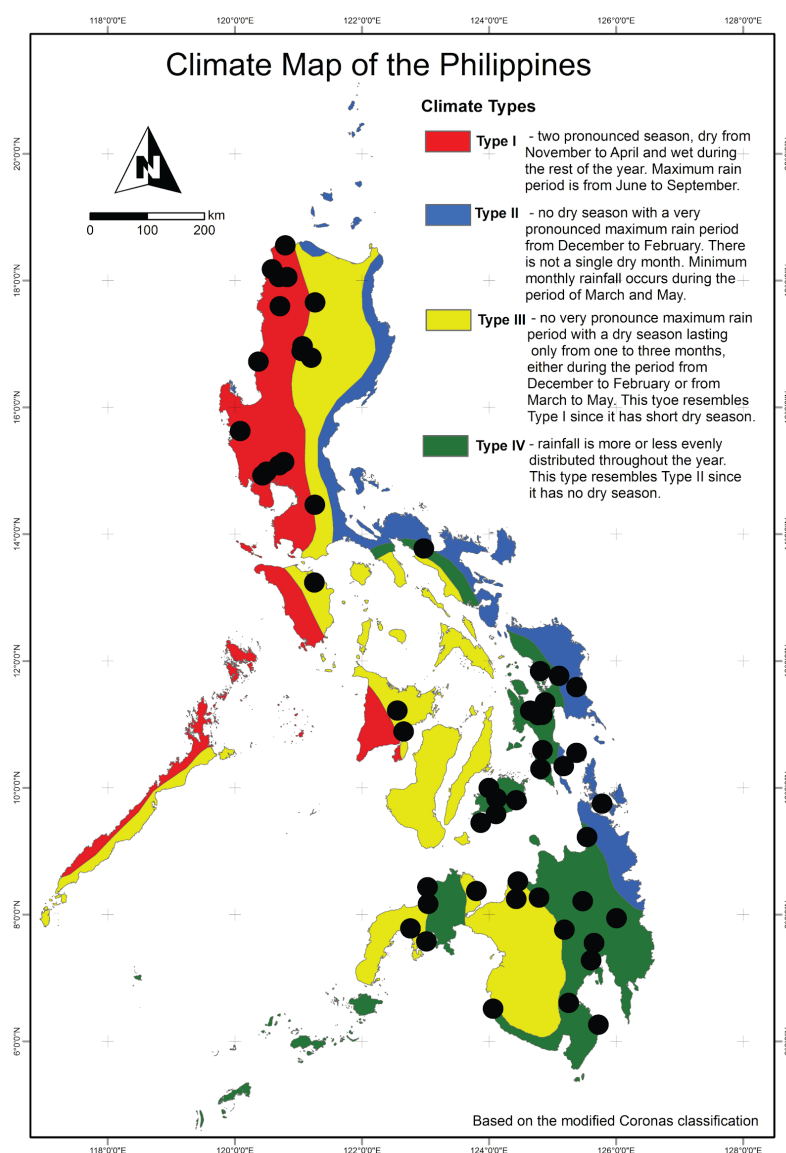

**Figure 1: Map of Philippines with location of streamflow stations** used in this analysis overlaid on climatic type (as in Tolentino et al., 2016; Kintanar, 1984; Jose and Cruz, 1999). Note that no long-term stations are available for Palawan.



## 105 2.2.2 Global Runoff Data Centre (GRDC) Reference Dataset

Ten catchments from the GRDC Reference Dataset were compiled  
 ([https://www.bafg.de/GRDC/EN/04\\_spcldtbss/43\\_GrN/refDataset\\_node.html](https://www.bafg.de/GRDC/EN/04_spcldtbss/43_GrN/refDataset_node.html); requested July 2019) and analysed in this  
 contribution. Over 45 sites from the Philippines are available in the GRDC data; however, ~~almost all do not~~ fulfil our criteria  
 of having over 10 years of coverage. Four of these catchments also duplicated or extended the BRS datasets, and one extends  
 110 a GSIM dataset (see below). Notably four of the time series available from GRDC are available back to the 1940s (Table 1).

## 2.2.1 Global Runoff Data Centre (GSIM) Reference Dataset

Only two time series of the available five GSIM time series (Maybeck et al., 2013, Gudmundsson et al., 2016, Do et  
 al., 2018) cover more than 10 years. Further, none of these data were included in the original training of GRUN due to  
 115 catchment size constraints.

## 2.3 Criteria for Inclusion of Datasets

All catchment areas were verified using the digital elevation model from the 2013 Interferometric Synthetic  
 Aperture Radar (IfSAR) data. All hydrologic datasets were normalized to runoff (mm/yr), sometimes also notated as  
 120 ‘specific discharge’ in the literature. We only considered streamflow stations where the published and verified areas agreed  
 and coverage spanned 10 or more years. The location of all streamflow stations is shown on Figure 1 and listed in Table 1.  
 Catchment areas span 4 orders of magnitude (8.93 to 6487 km<sup>2</sup>) and cover the majority of the Philippines excluding Palawan  
 (see Figure 1). The location of catchments was paired to GRUN grid cells (0.5° by 0.5°) for the analysis. Given that all but  
 one catchment is smaller than the area of the GRUN grid cells (~3,000 km<sup>2</sup>) we view this pairing as sufficient for validation  
 125 purposes. This assumption was tested by interpolating the GRUN grid to the gauging location as well as the watershed  
 centroids, and no significant difference in correlation to the observations ~~that~~ were observed.

## 2.4 Statistical Performance Metrics

To assess the performance of GRUN we use a suite of metrics commonly used to assess model performance in  
 130 hydrologic studies. These metrics are calculated for each individual catchment (n=55) and for each climate type (n=4; see  
 below) ~~shown in Figure 1.~~

Firstly, we use the commonly used square of the Pearson correlation coefficient ( $r^2$ ). This metric for bivariate  
 correlation measures the linear correlation between two variables. In this case the predicted monthly values from GRUN  
 versus the observed monthly values from the streamflow datasets. It varies from 0 (no linear correlation) to 1 (perfect  
 135 correlation). The use of  $r^2$  does not account for systematic over- or under-prediction in runoff because it only accounts for  
 correlation among the observed and predicted values (see Krause et al. (2005) for further discussion of the use of  $r^2$  in  
 hydrological model assessment).



Secondly, ~~the primary metric used here is~~ Volumetric Efficiency (VE) (Criss and Winston, 2008), ~~utilized~~  
 previously by Tolentino et al. (2016) on a subset of the BRS catchments analysed here. VE is defined as:

$$VE = 1 - \frac{\sum Q_P - Q_O}{\sum Q_O} \quad (1)$$

where P is the ~~modelled~~/predicted values and O is the observed runoff values. A value of 1 indicates a perfect score. Because  
 we are interested in the performance of GRUN over the period of each streamflow record, ~~unlike Tolentino et al. (2016),~~ we  
 calculate VE using all paired monthly observed and simulated values ~~rather than the monthly medians~~. This results in lower  
 VE scores than those previously reported by Tolentino et al. (2016) compared to hydrologic models.

Further, we use both the linear and logged Nash-Sutcliffe efficiency (NSE) parameter. Proposed by Nash and  
 Sutcliffe (1970) it is defined as:

$$NSE = 1 - \frac{\sum (Q_P - Q_O)^2}{\sum (Q_O - \text{mean}(Q_O))^2} \quad (2)$$

The range of NSE can be between  $-\infty$  and 1 (perfect fit). NSE values are useful (compared to VE) in that values less than  
 zero indicate that the mean value of the observed data is a better predictor than the hydrologic model. NSE is also calculated  
 using logarithmic values prior to calculation to reduce the influence of peak flow and increase the influence of low flow  
 values (see further discussion in Krause et al., 2005).

Finally, to evaluate a possible strategy for ~~performing~~ a bias correction of the GRUN simulated values at a  
 countrywide scale we use the **Root** Mean Square Error (RMSE) in units of runoff (i.e., mm/day). The RMSE is applied to the  
 raw GRUN simulated values and the observation based bias corrected GRUN values at the country, climate type (see below)  
 and individual catchment level.

## 2.5 Climate Types

The Philippines has four Climate Types (see also Abon et al., 2016; Tolentino et al., 2017): Type I Climate on the  
 western seaboard of the Philippines is characterized by distinct wet (May to October) and dry (November to April) seasons;  
 Type II Climate on the eastern seaboard has no distinct dry period with maximum rains occurring from November to  
 February; Type III inland climate ~~experiences~~ less ~~annual~~ rainfall with a short dry season (December to May) and a less  
 pronounced wet season (June to November); and, Type IV southeast inland climate ~~experiencing depressed~~ rainfall ~~and~~  
~~characterized by an~~ evenly distributed rainfall pattern throughout the year. ~~Further description is provided in Figure 1.~~

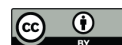

### 3 Results and Discussion

Statistical comparisons described above between individual catchments and the GRUN dataset are shown in the supplemental figures and tabulated in Table 1. Shown also in the supplemental figures (Figure A1) are time series comparisons between the GRUN runoff values and runoff (area-normalized discharge). Statistics performance metrics across all data as well as by climate types I to IV are also listed in Table 1. Given the emphasis on a country scale evaluation of GRUN we primarily focus below on results in aggregate grouped by climate type or among all catchments.

Across all observations GRUN has a  $r$ -squared of 0.372 and a VE of 0.363 (Table 2). Using  $\log(\text{runoff})$  values (following Criss and Winston, 2008) this improves to an  $r$ -squared of 0.546 and a volumetric efficiency (VE) of 0.733, suggesting reasonable utility in the GRUN product at a country scale for the Philippines, despite no training data from the Philippines being used in the creation of GRUN (Personal Communications, G. Ghiggi, 2019). The raw RMSE across the dataset is 2.648 mm/day (Table 2). In the following we break down the comparison between the streamflow observations and GRUN by first comparing runoff distributions and extreme values at the individual basin level, then aggregating our results by Climate Type, and finally look at several correlations of VE to watershed characteristics.

#### 3.1 Comparison of runoff distributions

Average runoff values among all catchments compared to GRUN show reasonably good predicted values. In Figure 2A, median values of runoff (black dots) given a volumetric efficiency (VE) metric of 0.509 across all catchments, the average (mean) difference between median observations and simulated values is +16%. Looking at extreme monthly values (maximum and minimum) over the months of observation demonstrates significant underprediction in wettest conditions (orange dots in Figure 2A) with almost all catchments' maximum observations falling above the 1:1 line and a lower VE score of maximum values of 0.194. For baseflow conditions, spread around the 1:1 line for minimum values is more evenly distributed, however the VE score of 0.154 is similarly low due to a greater spread than the median values.

Comparison of runoff distributions ranked by catchment size in Figure 2B demonstrates that maximum runoff values appear to be most underpredicted by GRUN in the smallest catchments. However, we do find a significant correlation (at  $p < 0.01$ ,  $r^2 = 0.391$ ) between  $\log$  values of maximum runoff difference (observed minus predicted) versus catchment area (not shown), with a negative relationship. This suggests that particularly for small catchments, which may have steeper average slope, GRUN underpredicts monthly runoff values associated with the wet season.

In general, the median and interquartile ranges (IQR, 25% to 75%) shown in Figure 2C overlap between GRUN and the observations. For five catchments of large ( $n=2$ ) and relatively small sizes ( $n=3$ ) the IQR of the observations does not overlap with the GRUN runoff IQR. The three small catchments are Climate Type III (yellow) and the two large catchments are Climate Type IV. In two catchments of moderate size the GRUN IQR is greater than the observed IQR runoff range.



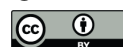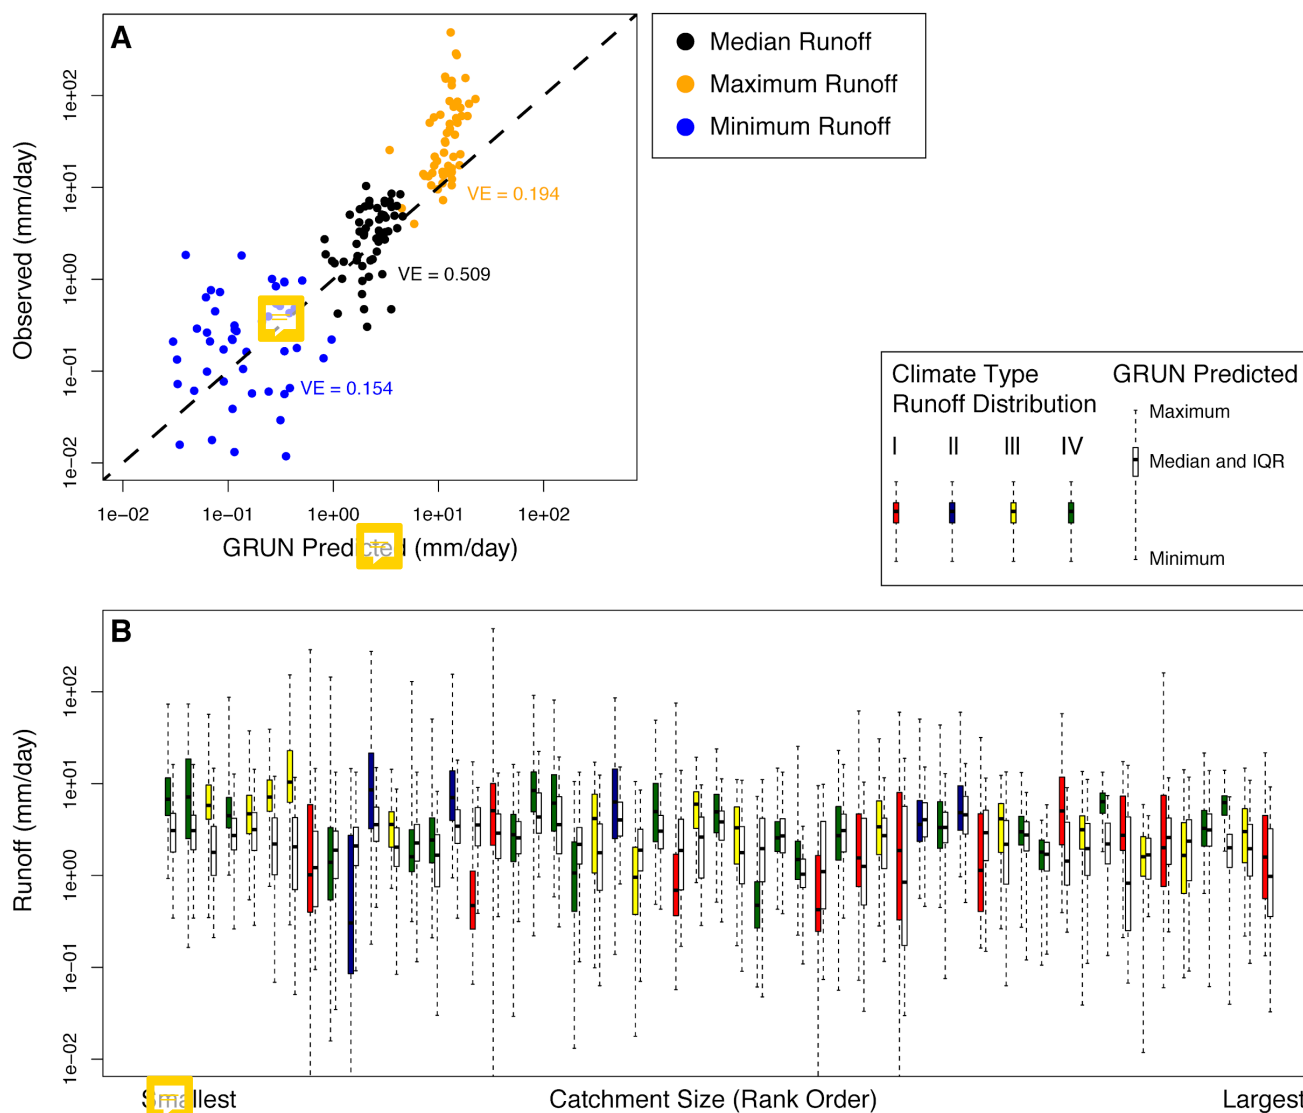

**Figure 2.** Comparison of runoff ranges and distributions. **(A)** Comparison of median and extreme (maximum and minimum) monthly values between the observations and GRUN. **(B)** Distribution of runoff between observations (colored) and GRUN (white) using box and whisker plots. Plots show the median, interquartile range and maximum/minimum values. The GRUN distributions only include months where observations are present.



### 3.2 Comparison by climate type

In all basins regardless of Climate Type, a general underestimation of the model is seen for the highest runoff months, as noted above looking at the distributions by basin. This is especially evident in Climate Types I and II with pronounced wet seasons as also shown by their lower  $r^2$  values (Figure 3) and lower VE values. Climate Type II also has the highest RMSE value of 4.554 mm/day. Climate Types III and IV have comparable  $r^2$  and VE values though skewness towards underprediction during the highest runoff months is still evident, particularly for Climate Type IV.

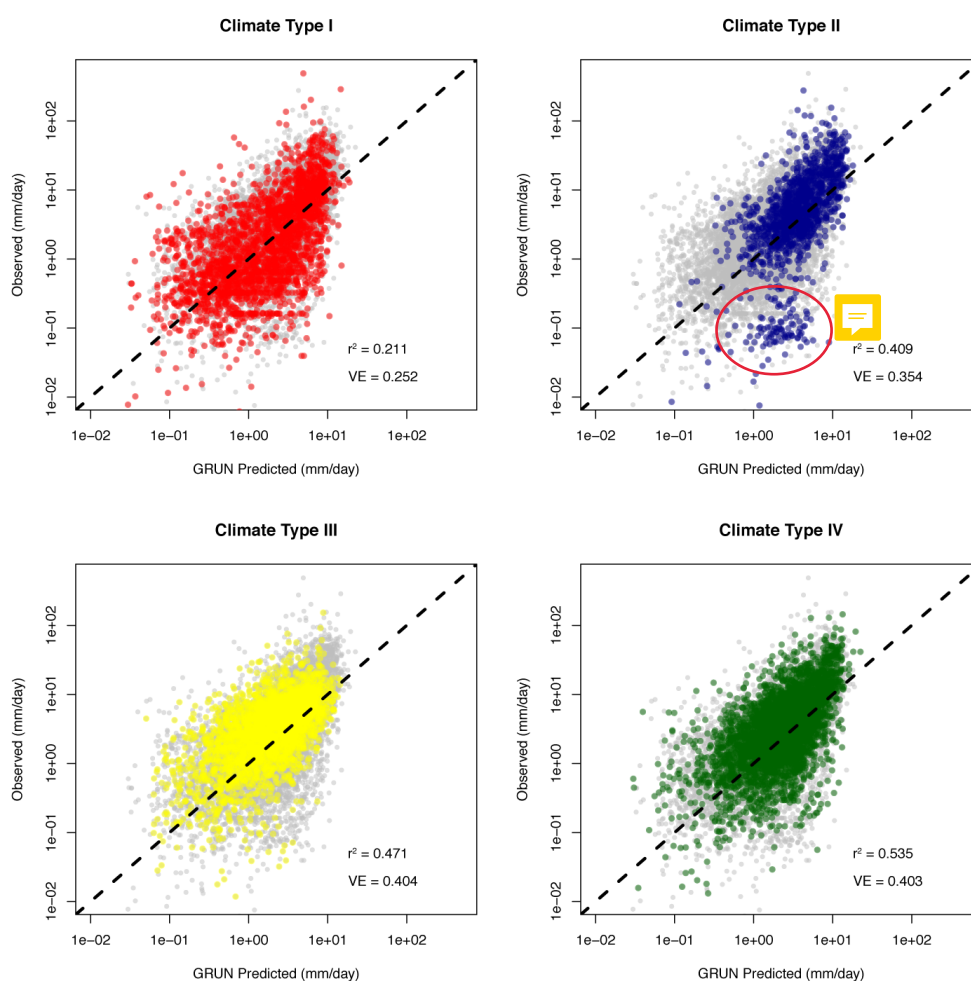

**Figure 3: Cross plots of GRUN predicted vs. observed monthly runoff by climate type (see Figure 1 for climate type distributions).** Grey dots represent all data, colored dots represent data points from that region. The squared pearson correlation coefficient ( $r^2$ ) and volumetric efficiency (VE) metrics are listed on each panel.



### 3.3 Correlation and trends with watershed characteristics

In this section we analyse two potential correlations between watershed characteristics and VE scores. In Figure 4 we show a weak positive correlation ( $r^2 = 0.041$ ,  $p = 0.137$ ) between VE and  $\log(\text{catchment size})$  (listed in Table 1) and a stronger negative correlation with mean runoff ( $r^2 = 0.182$ ,  $p < 0.01$ ). However, at low runoff there is significant spread in VE score, driven primarily by Climate Type I catchments (red box and whisker plot in Figure 4C). These catchments experience distinct wet and dry seasons in the northwest Philippines. The positive correlation with catchment size is likely primarily due to the extreme wet months biasing results as described above. This is particularly evident from the Nash-Sutcliffe Efficiency (NSE) and  $\log(\text{Nash-Sutcliffe Efficiency})$  (NSE- $\log_{10}$ ) scores in Table 2 and Table A1. As discussed by Criss and Winston (2008) the NSE- $\log_{10}$  scores are in most cases significantly more skillful among our catchments because extremely wet months are weighted less than using the raw runoff values. It is also notable that the VE scores using  $\log_{10}$  values across the entire dataset is significantly improved (0.363 vs. 0.733; Table 2).

Previous studies have investigated the correlation between runoff and catchment size (Mayor et al., 2011), and the different hydrologic and geologic factors that cause non-linear relationships between these two variables (Rodriguez et al., 2014). Recently, Zhang et al. (2019) point out that runoff coefficients increase logarithmically as catchment size decreases. Moreover, the same paper reports that smaller catchments are more sensitive to vegetation cover, slope, and land use compared to larger catchments. This implies that predictability of basin runoff for smaller catchments are increasingly more difficult due to variances in the compounding factors mentioned above but more importantly that runoff-catchment size relationship derived from large basins must be corrected when applied to smaller catchments. We hypothesize that these effects proposed by Zhang et al. (2019) are also influencing the Philippines streamflow dataset utilized in this study. As such, we suggest that GRUN, while useful for studying trends, seasonality and average runoff from tropical catchments (e.g., Merz et al., 2011; Wanders and Wada, 2015) in the Philippines, is not suitable for extreme value analyses associated with major tropical storms during the wet seasons unless suitable bias corrections (see next section) can be effectively carried out.

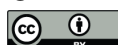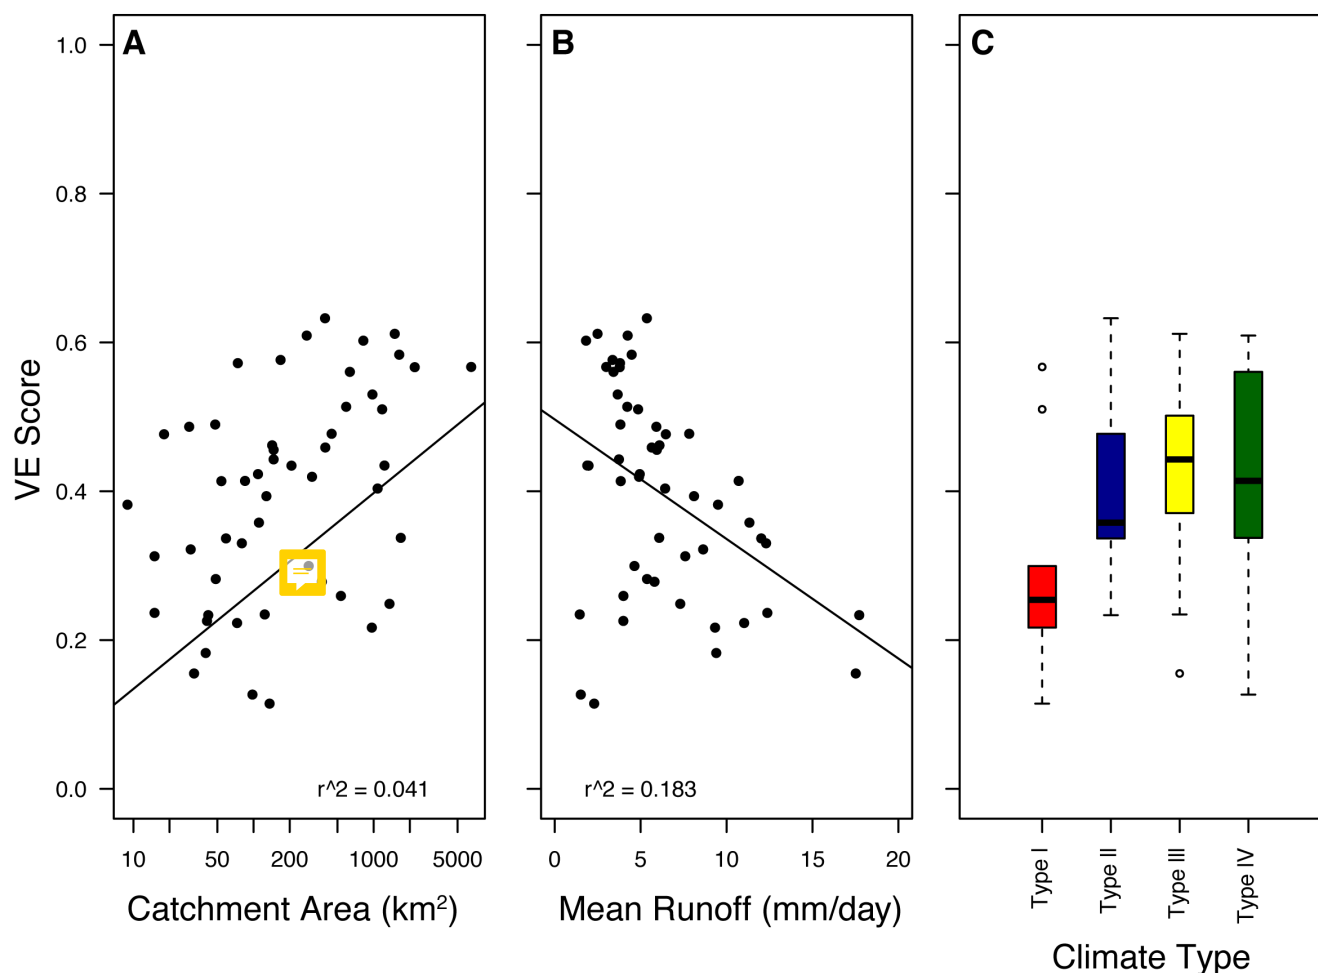

**Figure 4: Diagnostic plots of volumetric efficiency (VE) results.** Cross-plots show the correlation of VE with (A) catchment area and (B) mean runoff. (C) Box and whisker plots show data from distribution of VE by climate type. Box and whisker plots show the median, interquartile range and 95% confidence intervals and outliers (dots). The regression in (A) is between the VE scores and  $\ln(\text{Catchment Area})$ .

### 3.4 Bias Correction and Outlook

Overall, the GRUN data underestimates the actual observed runoff from Philippine basins. The GRUN dataset shows a range of 0 to 10mm/day for most basins and up to 20mm/day for larger basins in the group. The observed maximum runoff values are on average higher by and exceed 50mm/day during extreme rain events (Figure 3). Furthermore, the GRUN dataset also appears to underestimate minimum flow in streams from highly seasonal catchments (e.g. Types I and II).



These discrepancies may be a function of the direct interpolation of large basin characteristics to smaller basins as discussed in the previous section. The underestimation of runoff values during extreme rain events may also be a result of the fast saturation of the overlying soil and exceedance of ~~rates of~~ infiltration partly as a result of shallow aquifers filling up and consequently the conversion of excess rainfall into direct runoff (e.g., Tarasova et al., 2018). On the other hand, the underestimation of flow during low flow events may be a result of not accurately accounting for stream baseflow which is fed by shallow aquifers.

Given the biases observed in our analysis and in particular the clear underprediction of GRUN during the wettest months we perform a bias correction of the GRUN dataset at a nationwide level using all the available filtered data used in our analysis. We do so in a two-step process to both correct the mean offset and stretch the wettest months to higher values with all transformations occurring in log-transform space (i.e., as displayed in Figure 3). Thus, we first add the mean  $\log_{10}(\text{runoff})$  difference between the observations and the predicted values (0.117). Following this, using the *lm* function in R, we fit a linear regression between the observations and the GRUN predicted values ( $\log_{10}(\text{runoff, observed}) = m \times \log_{10}(\text{runoff, predicted}) + b$ ) and correct the predicted values using the slope ( $m=0.774$ ) and intercept ( $b=0.099$ ) derived from this regression. By carrying out these calculations in log-transform space the highest GRUN runoff values are ~~the most significantly~~ affected, which are the data points we have observed to be most underpredicted in our above analysis (Figures 2A and 3).

To assess this bias correction, we calculated RMSE values at a catchment, climate type and countrywide level (Figure 5 and Tables 2 and A1). The log-transform bias correction ~~greatly~~ improves the nationwide RMSE value by an order of magnitude (2.648 vs. 0.292) and most significantly improves catchments from Climate Types III and IV (Figure 5; 2.285 vs. 0.432 and 2.398 vs. 0.131, respectively; Table 2). Interestingly, the median RMSE value for Climate Type I and II catchments are not significantly improved, however, the RMSE range for both ~~have been~~ reduced (red and blue boxes in Figure 5, respectively).

This analysis and the improvement of RMSE values, as well as some ~~of~~ performance metrics such as NSE (see scores tabulated in Table 2), using a simple log-transform based bias correction demonstrates the importance of either: 1) including smaller catchments in future ~~iterations~~ of products such as GRUN, or 2) performing similar bias corrections on a country, region ~~or even catchment scale~~ as appropriate. This is particularly important given that ~~taken at face value~~ the ~~proportional~~ contribution of relatively small tropical land areas to global discharge ~~accounting~~ (e.g., Dai and Trenberth, 2002) would be underestimated without such corrections.

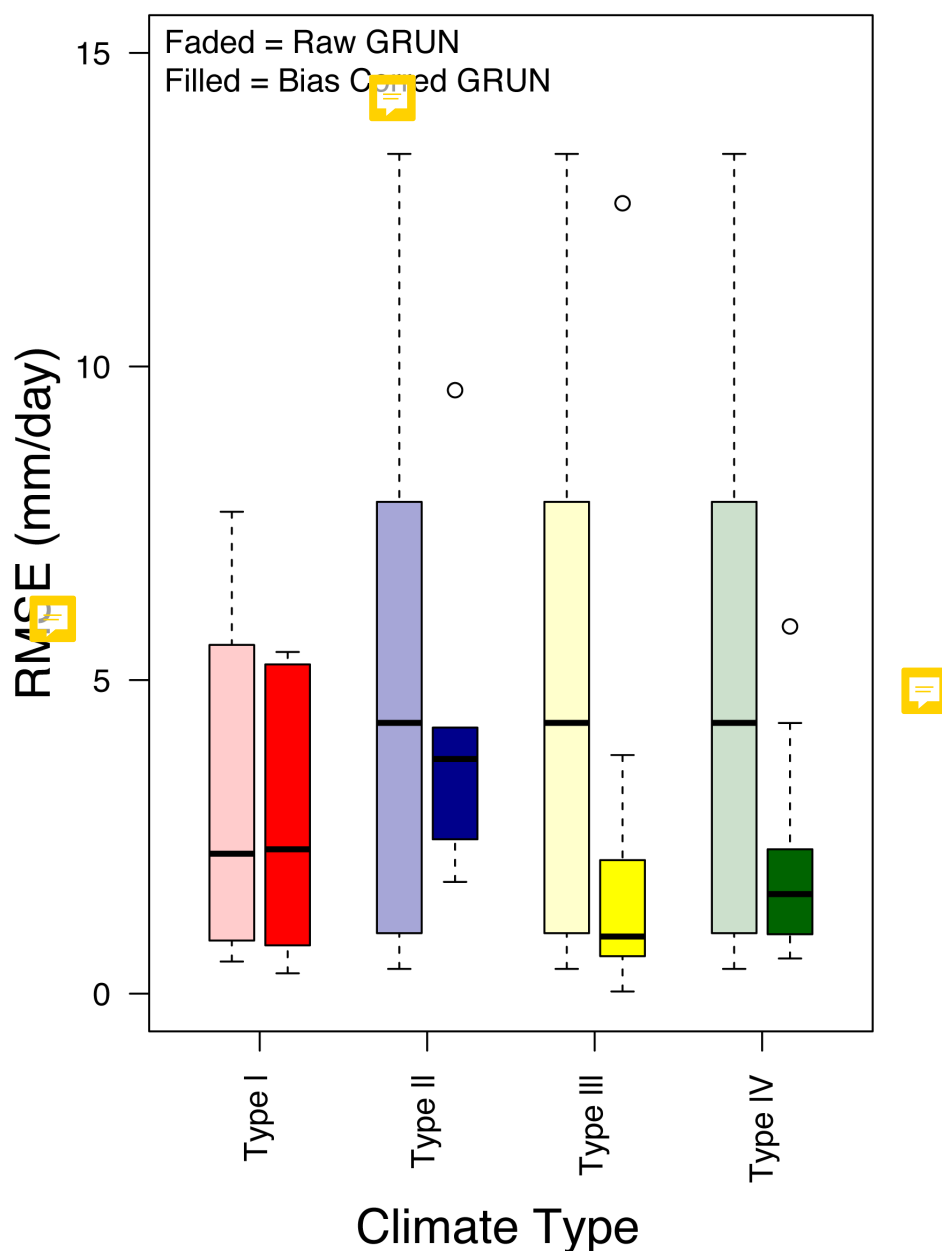

**Figure 5.** Root Mean Square Error (RMSE) box and whisker plots of catchments grouped by climate type of observed values versus raw GRUN values (light-colored boxes) and bias-corrected GRUN values (bold-colored boxes). For bias correction equation and country-wide results see Table 2.

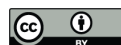

#### 4 Conclusion

Using monthly runoff observations from catchments in the Philippines with more than 10 years of data between 1946 and 2014, we demonstrated ~~across all observations~~ significant but weak correlation ( $r^2 = 0.372$ ) and ~~skillful prediction~~ (Volumetric Efficiency = 0.363 and log(Nash-Sutcliffe Efficiency) = 0.453) between the GRUN-predicted values and actual observations. Looking at different hydrometeorological regimes, we demonstrated that GRUN performs best ~~among~~ low rainfall catchments located in climate types III and IV and ~~showed~~ a weak negative positive correlation between volumetric efficiency and catchment area. Further, we found that particularly for smaller catchments, maximum wet season values are grossly underpredicted by GRUN.  The application of a nationwide bias correction to stretch high runoff values using log-transform runoff values greatly improved the RMSE of the predicted values. We thus propose ~~that the utilization of the~~ GRUN dataset can be extended to other ungauged tropical regions with smaller catchments ~~upon~~ applying a ~~similar~~ correction as described in this study.

#### Acknowledgements

We thank the Republic of the Philippines Department of Science and Technology Philippine Council for Industry, Energy, and Emerging Technology Research and Development (DOST-PCIEERD) Balik Scientist program for facilitating collaboration between the authors. This project was partially supported through the DOST-PCIEERD project entitled, Catchment Susceptibility to Hydrometeorological Events supporting Tolentino and David, and a DOST-PCIEERD Balik Scientist award to Ibarra. Ibarra is funded by the UC Berkeley Miller Institute and UC President's Postdoctoral Fellowship. We acknowledge the help of Mart Geronia, Allen Marvin Yutuc, Iris Joy Gonzales, Jia Domingo and EJ Terciano Jr. for help with dataset compilation. DPWH-BRS, GISM and GRDC for datasets availability.

#### 315 Data availability

Data was compiled from the DPWH-BRS, GISM and GRDC datasets (see links in text) and is made available as a supplemental file.

#### Author contributions

320 DEI and CPCD designed the study, DEI and PLMT carried out the dataset compilation and screening, PLMT verified catchment areas, DEI and PLMT carried out the analysis, and DEI and CPCD prepared the manuscript with contributions from PLMT.

#### Competing interests

325 The authors declare that they have no conflict of interest.



## References

- Abon, C. C., David, C. P. C., and Bellejera, N. E. B.: Reconstructing the Tropical Storm Ketsana flood event in Marikina River, Philippines, *Hydrol. Earth Syst. Sci.*, 15, 1283–1289, doi:10.5194/hess-15-1283-2011, 2011.
- 330 Abon, C. C., Kneis, D., Crisologo, I., Bronstert, A., David, C. P. C., Heistermann, M.; Evaluating the potential of radar-based rainfall estimates for streamflow and flood simulations in the Philippines, *Geomat. Nat. Haz. Risk.*, 7, 1390-1405, doi:10.1080/19475705.2015.1058862, 2016
- Criss, R. E. and Winston, W. E.: Do Nash values have value? Discussion and alternate proposals. *Hydrol. Process.*, 22(14),  
 335 2723-2725, doi:10.1002/hyp.7072, 2008.
- Dai, A., and Trenberth, K. E.: Estimates of Freshwater Discharge from Continents: Latitudinal and Seasonal Variations, *Journal of Hydrometeorology*, 3 (6), 660-687, 2002.
- 340 David, C. P., Cruz, R. V. O., Pulhin, J. M., and Uy, N. M., Freshwater Resources and Their Management, In, Philippine Climate Change Assessment Report WG2: Impacts, Vulnerabilities and Adaptation, OML Foundation, 34-54, 2017.
- Do, H. X., Gudmundsson, L., Leonard, M., and Westra, S.: The Global Streamflow Indices and Metadata Archive (GSIM) – Part 1: The production of a daily streamflow archive and metadata, *Earth Syst. Sci. Data*, 10, 765–785,  
 345 https://doi.org/10.5194/essd10-765-2018, 2018.
- Evaristo, J., and McDonnell, J. J.: Global analysis of streamflow response to forest management: *Nature*, 570, 455-461, doi:10.1038/s41586-019-1306-0, 2019.
- 350 Ghiggi, G., Humphrey, V., Seneviratne, S.I., Gudmundsson, L. 2019. GRUN: An observations-based global gridded runoff dataset from 1902 to 2014. *Earth Sys. Sci.*, 11, 1655-1674, doi:10.5194/essd-11-1655-2019, 2019
- Gudmundsson, L., Do, H. X., Leonard, M., and Westra, S.: The Global Streamflow Indices and Metadata Archive (GSIM) – Part 2: Quality control, time-series indices and homogeneity assessment, *Earth Syst. Sci. Data*, 10, 787–804,  
 355 https://doi.org/10.5194/essd-10-787-2018, 2018b.
- Jose, A. M., and Cruz, N. A.: Climate change impacts and responses in the Philippines: water resources, *Clim Res.*, 12 (2-3), 77–84, 1999.
- 360 Kim, H., Watanabe, S., Chang, E. C., Yoshimura, K., Hirabayashi, J., Famiglietti, J., and Oki, T.: Global Soil Wetness Project Phase 3 Atmospheric Boundary Conditions (Experiment 1) [Data set], Data Integration and Analysis System (DIAS), doi:10.20783/DIAS.501, 2017.
- Kintanar R. L.: Climate of the Philippines, PASAGA report, 38, 1984.
- 365 Kumar, P., Masago, Y., Mishra, B. K., and Fukushima, K., Evaluating future stress due to combined effects of climate change and rapid urbanization for Pasig Marikina river, Manila, *Groundwater Sustain. Develop.*, 6, 227-34, doi:10.1016/j.gsd.2018.01.004, 2018
- 370 Kummu, M., Guillaume, J. H. A., de Moel, H., Eisner, S., Flörke, M., Porkka, M., Siebert, S., Veldkamp, T. I. E., and Ward, P. J.: The world's road to water scarcity: shortage and stress in the 20th century and pathways towards sustainability, *Nat. Sci. Rep.*, 6, 38495, https://doi.org/10.1038/srep38495, 2016.



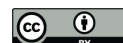

- 375 Meybeck, M., Kummu, M. and Dürr, H. H.: Global hydrobelts and hydroregions: improved reporting scale for water-related issues, *Hydrol. Earth Syst. Sci.*, 17, 1093–1111, doi: 10.5194/hess-17-1093-2013, 2013.
- Mayor, A. G., Bautista, S., and Bellot, J.: Scale-dependent variation in runoff and sediment yield in a semiarid Mediterranean catchment, *J. Hydrol.*, 397 (1-2), 128-135, doi:10.1016/j.jydrol.2010.11.039.
- 380 Merz, R., Parajka, J., and Blöschl, G.: Time stability of catchment model parameters: Implications for climate impact analyses, *Water Resources Research*, 47 (2), doi: 10.1029/2010WR009505, 2011.
- Nash, J. E. and Sutcliffe, J. V.: River flow forecasting through conceptual models part I – A discussion of principles, *J. Hydrol.*, 10, 282–290, doi:10.1016/0022-1694(70)90255-6, 1970.
- 385 Nurse, L. A., McLean, R. F., Agard, J. Briguglio, L.P., Duvat-Magnan, V., Pelesikoti, N., Tompkins, E. and Webb, A.: Small islands. In: *Climate Change 2014: Impacts, Adaptation, and Vulnerability. Part B: Regional Aspects. Contribution of Working Group II to the Fifth Assessment Report of the Intergovernmental Panel on Climate Change* [Barros, V.R., et al. (eds.)]. Cambridge University Press, Cambridge, United Kingdom and New York, NY, USA, Ch. 29, 1613-1654, 2014.
- 390 Paronda, G. R. A., David, C. P. C., and Apodaca, D. C.: River flow patterns and heavy metals concentrations in Pasig River, Philippines as affected by varying seasons and astronomical tides, *IOP Conf. Series: Earth and Environmental Science* 344, 012049, doi: 10.1088/1755-1315/344/1/012049, 2019.
- 395 Rodríguez, C., Emilio, Cantón, Yolanda, Lazaro, R., et al. 2014. Cross-scale interactions between surface components and rainfall properties. Non-linearities in the hydrological and erosive behavior of semiarid catchments. *J. Hydrol.* 517:815–825.
- Tarasova, L., Basso, S., Zink, M. and Merz, R.: Exploring Controls on Rainfall-Runoff Events: 1. Time Series-Based Event Separation and Temporal Dynamics of Event Runoff Resposne in Germany, *Water Resources Research*, 54 (10), 7711-7732, doi:10.1029/2018WR022587, 2018.
- 400 Tolentino, P. L. M., poortinga, A., Kanamaru, H., Keesstra, S., Maroulis, J., David, C. P. C., Ritsema, C. J.: Projected Impact of Climate Change on Hydrological Regimes in the Philippines, *PLoS ONE*, 11(10), e0163941, doi: 10.1371/journal.pone.0163941, 2016.
- 405 Wanders, N. and Wada, Y.: Decadal predictability of river discharge with climate oscillations over the 20th and early 21st century, *Geophys. Res. Lett.*, 42, 10689–10695, https://doi.org/10.1002/2015GL066929, 2015.
- WEF: The Global Risks Report 2018, available at: <http://reports.weforum.org/global-risks-2018/>.
- 410 Zhang, Q., Liu, J., Yu, X. and chen, L.: Scale effects on runoff and a decomposition analysis of the main driving factors in the Haihe Basin mountainous area. *Sci. Tot. Env.*, 690, 1089-1099, doi: 10.1016/j.scitotenv.2019.06.540, 2019



**Table 1: List of stations** used in this analysis including full station names, updated catchment areas, years of coverage, division, and climate type.

| River Name           | Station Name                                  | Latitude | Longitude | Coverage                        | Years of coverage | Catchment Area (km <sup>2</sup> ) | Dataset                                   | Climate Type |
|----------------------|-----------------------------------------------|----------|-----------|---------------------------------|-------------------|-----------------------------------|-------------------------------------------|--------------|
| Sinalang River       | Penarrubia, Abra                              | 17.622   | 120.715   | 1984-2015                       | 32                | 136.128                           | BRS                                       | 1            |
| Antequera River      | Sto. Rosario, Antequera, Bohol                | 9.493    | 123.890   | 1984-2016                       | 33                | 54                                | BRS                                       | 4            |
| Amparo River         | Brgy. Mabini, Macarhon, So. Leyte             | 10.042   | 124.018   | 1985-2007                       | 23                | 74                                | BRS                                       | 4            |
| Hira-an River        | Upper Hiraan, Rarigara, Leyte                 | 11.258   | 124.672   | 1986-2010                       | 27                | 8.93                              | BRS                                       | 4            |
| Leyte River          | San Joaquin, Capocan, Leyte                   | 11.880   | 124.829   | 1985-2007                       | 23                | 29.15                             | BRS                                       | 3            |
| Surigao River        | Surigao City                                  | 9.796    | 125.808   | 1986-2010                       | 25                | 85                                | BRS                                       | 4            |
| Bais River           | Cabanlutan, Bais City, Negros Oriental        | 9.876    | 124.140   | 1989-2015                       | 27                | 41                                | BRS                                       | 2            |
| Lingayon River       | Lingayon, Alang-Alang, Leyte                  | 11.192   | 124.863   | 1957-1991                       | 35                | 18                                | BRS                                       | 4            |
| Sapiniton River      | Libton, San Miguel, Leyte                     | 11.188   | 124.795   | 1984-2010                       | 27                | 277.3                             | BRS                                       | 4            |
| Laoag River          | Poblacion, Laoag City, Ilocos Norte           | 18.203   | 120.590   | 1984-2016                       | 33                | 1355                              | BRS; updated from Tolentino et al. (2016) | 1            |
| Pared River          | Baybayog, Alcala, Cagayan                     | 17.682   | 121.270   | 1983-1996                       | 14                | 966                               | BRS; used in Tolentino et al. (2016)      | 1            |
| Ganano River         | Ipil, Echague, Isabela                        | 16.812   | 121.211   | 1986-2001                       | 16                | 977                               | BRS; used in Tolentino et al. (2016)      | 3            |
| Magat River          | Baretbet, Bagabag, Nueva Vizcaya              | 16.992   | 121.073   | 1986-2002                       | 17                | 2199                              | BRS; used in Tolentino et al. (2016)      | 3            |
| Camiling River       | Poblacion, Mayantoc, Tarlac                   | 15.018   | 120.503   | 1985-2017                       | 33                | 288                               | BRS; updated from Tolentino et al. (2016) | 1            |
| Gumain River         | Sta. Cruz, Lubao, Pampanga                    | 14.960   | 120.441   | 1985-2001                       | 17                | 370                               | BRS; used in Tolentino et al. (2016)      | 1            |
| Rio Chico River      | Sto. Rosario, Zaragosa, Nueva Ecija           | 15.658   | 120.088   | 1985-2006                       | 22                | 1177                              | BRS; used in Tolentino et al. (2016)      | 1            |
| San Juan River       | Porac, Calamba, Laguna                        | 14.498   | 121.267   | 1986-1999                       | 14                | 165                               | BRS; used in Tolentino et al. (2016)      | 4            |
| Pangalaan River      | Pangalaan, Pinamlayan, Oriental Mindoro       | 13.275   | 121.260   | 1989-1999                       | 11                | 32                                | BRS; used in Tolentino et al. (2016)      | 3            |
| Das-ay River         | Sto. Nino II, Hinungangan, Leyte              | 10.385   | 125.202   | 1987-2007                       | 21                | 59                                | BRS; used in Tolentino et al. (2016)      | 2            |
| Tukuran River        | Tinotongan, Tukuran, Zamboanga del Sur        | 7.627    | 123.030   | 1986-2009                       | 24                | 147                               | BRS; used in Tolentino et al. (2016)      | 3            |
| Hijo River           | Apokan, Tagum, Davao del Norte                | 7.812    | 125.211   | 1986-2016                       | 31                | 634                               | BRS; updated from Tolentino et al. (2016) | 4            |
| Cagayan de Oro River | Cabula, Cagayan de Oro City, Misamis Oriental | 8.316    | 124.811   | 1991-2004                       | 14                | 1079                              | BRS; used in Tolentino et al. (2016)      | 4            |
| Davao River          | Tigatto, Davao City                           | 7.329    | 125.634   | 1984-1999                       | 16                | 1683                              | BRS; used in Tolentino et al. (2016)      | 4            |
| Allah River          | Impao, Isulan, Sultan Kudarat                 | 6.568    | 124.085   | 1980-1994                       | 15                | 1231                              | BRS; used in Tolentino et al. (2016)      | 3            |
| Agusan Canyon River  | Camp Philips, Manolo Fortich, Bukidnon        | 8.296    | 124.450   | 1986-2004                       | 19                | 48                                | BRS; updated from Tolentino et al. (2016) | 3            |
| Wawa River           | Wawa, Bayugan, Agusan del Sur                 | 8.261    | 125.501   | 1981-2010                       | 30                | 396                               | BRS; updated from Tolentino et al. (2016) | 4            |
| Buayan River         | Malandag, Malungon, South Cotabato            | 6.317    | 125.749   | 1986-2004                       | 19                | 207                               | BRS; used in Tolentino et al. (2016)      | 4            |
| Gasgas River         | Manalpac, Solsona                             | 18.080   | 120.830   | 1978-1988                       | 11                | 73                                | GISM                                      | 1            |
| Jalaur River         | Calyan, Pototan, Iloilo                       | 10.930   | 122.670   | 1976-1988                       | 13                | 1499                              | GISM and GRDC                             | 3            |
| Padsan River         | Bangay                                        | 18.080   | 120.700   | 1946-1979                       | 34                | 534                               | GRDC                                      | 1            |
| Pampanga River       | San Agustin                                   | 15.170   | 120.780   | 1946-1977                       | 32                | 6487                              | GRDC                                      | 1            |
| Sipocot River        | Sabang                                        | 13.810   | 122.990   | 1946-1970                       | 25                | 447                               | GRDC                                      | 2            |
| Mambusao River       | Tumalalud                                     | 11.260   | 122.570   | 1950-1978                       | 29                | 307                               | GRDC                                      | 3            |
| Padada River         | Lapulabao                                     | 6.660    | 125.280   | 1949-1978                       | 30                | 821                               | GRDC                                      | 4            |
| Aloran River         | Juan Bacay, Aloran, Misamis Occ.              | 8.420    | 123.820   | 1978-2003                       | 26                | 30                                | GRDC + BRS                                | 3            |
| Cabacanan River      | Baduang, Pagudpud                             | 18.580   | 120.800   | 1979-2017                       | 39                | 60                                | GRDC + BRS                                | 1            |
| Maragayap River      | Sta. Rita, Bacnotan, La Union                 | 16.750   | 120.374   | 2004-2017                       | 14                | 40                                | BRS                                       | 1            |
| Abacan River         | San Juan, Mexico, Pampanga                    | 15.118   | 120.703   | 2004-2017                       | 14                | 217                               | BRS                                       | 1            |
| Hibayog River        | La Victoria, Carmen, Bohol                    | 9.876    | 124.141   | 2004-2017                       | 14                | 41                                | BRS                                       | 4            |
| Manaba River         | Calma, Garcia-Hernandez, Bohol                | 9.631    | 124.131   | 2001-2016                       | 16                | 98                                | BRS                                       | 4            |
| Gabayan River        | Canawa, Candijay, Bohol                       | 9.848    | 124.450   | 2001-2017                       | 17                | 48.5                              | BRS                                       | 4            |
| Bangkerohan River    | Brgy. Tagaytay, Bato, Leyte                   | 10.342   | 124.834   | 1984-1990; 2000-2009            | 17                | 168                               | BRS                                       | 4            |
| Borongan River       | Brgy. San Mateo, Borongan City                | 11.628   | 125.403   | 1990-2008                       | 19                | 111                               | BRS                                       | 2            |
| Loom River           | Brgy. Calico-an, Borongan City                | 10.594   | 125.404   | 1986-2004                       | 19                | 42                                | BRS                                       | 2            |
| Pagbanganan River    | Brgy. Makinhas, Baybay City                   | 10.637   | 124.865   | 1984-2008                       | 25                | 128                               | BRS                                       | 4            |
| Rizal River          | Brgy. Rizal, Babatngon, Leyte                 | 11.389   | 124.908   | 1990-2008                       | 18                | 15                                | BRS                                       | 4            |
| Tenani River         | Brgy. Tenani, Paranas (Wright), Samar         | 11.806   | 125.127   | 1985-2001; 1985-1991; 1997-2000 | 17                | 394                               | BRS                                       | 2            |
| Disakan River        | Disakan, Manukan, Zamboanga del Norte         | 8.480    | 123.048   | 2002-2011                       | 10                | 143                               | BRS                                       | 3            |
| Kabasalan River      | Banker, Kabasalan, Sibugay, Province          | 7.831    | 122.778   | 1990-2003                       | 14                | 590.5                             | BRS                                       | 3            |
| Sindangan River      | Dicoyong, Sindangan, Zamboanga del Norte      | 8.217    | 123.057   | 1991-2009                       | 19                | 124                               | BRS                                       | 3            |
| Alubijid River       | Alubijid, Misamis Oriental                    | 8.570    | 124.476   | 2004-2016                       | 13                | 147                               | BRS                                       | 4            |
| Kipaliko River       | Tiburcia, Kapalong, Davao del Norte           | 7.602    | 125.681   | 1987-1995; 2005-2010            | 15                | 15                                | BRS                                       | 3            |
| Banaue River         | Poblacion, Banaue, Ifugao                     | 16.915   | 121.061   | 2002-2015                       | 14                | 80                                | BRS                                       | 4            |
| Aciga River          | Santiago, Agusan del Norte                    | 9.269    | 125.570   | 1982; 1984-1987; 1989-2010      | 27                | 1633                              | BRS                                       | 4            |
| Agusan River         | Sta. Josefa, Agusan del Sur                   | 7.993    | 126.036   | 2010                            | 27                | 1633                              | BRS                                       | 4            |

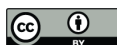

**Table 2: Results of statistical agreement** between GRUN aggregated by Climate Type and for the entire dataset (see Table A1 for individual catchments)

|                              | Pearsons Coeff ( $r^2$ )* | Volumetric Efficiency (VE) | Nash-Sutcliffe Efficiency (NSE) | Nash-Sutcliffe Efficiency (NSE-log10) | Root Mean Square Error | Root Mean Square Error Bias Corrected * | Volumetric Efficiency (VE) Bias Corrected ** | Nash-Sutcliffe Efficiency (NSE) Bias Corrected ** | Nash-Sutcliffe Efficiency (NSE-log10) Bias Corrected ** |
|------------------------------|---------------------------|----------------------------|---------------------------------|---------------------------------------|------------------------|-----------------------------------------|----------------------------------------------|---------------------------------------------------|---------------------------------------------------------|
| Entire Dataset               | 0.372                     | 0.363                      | 0.091                           | 0.453                                 | 2.648                  | 0.292                                   | 0.323                                        | 0.182                                             | 0.385                                                   |
| Entire Dataset log10(runoff) | 0.546                     | 0.733                      | n/a                             | n/a                                   | n/a                    | n/a                                     | 1.067                                        | n/a                                               | n/a                                                     |
| Climate Type 1 (n=12)        | 0.211                     | 0.252                      | 0.062                           | 0.538                                 | 2.476                  | 0.298                                   | 0.168                                        | 0.111                                             | 0.432                                                   |
| Climate Type 2 (n=6)         | 0.409                     | 0.354                      | 0.05                            | 0.49                                  | 4.554                  | 0.544                                   | 0.349                                        | 0.188                                             | 0.457                                                   |
| Climate Type 3 (n=15)        | 0.471                     | 0.404                      | 0.026                           | 0.23                                  | 2.285                  | 0.432                                   | 0.345                                        | 0.011                                             | 0.188                                                   |
| Climate Type 4 (n=22)        | 0.5                       | 0.403                      | 0.159                           | 0.414                                 | 2.398                  | 0.131                                   | 0.377                                        | 0.323                                             | 0.36                                                    |

**Notes**

\* For regressions forced through intercept

\*\* Two-step bias correction procedure where first mean offset is added to the predicted GRUN values and then a log-transform stretch correction is applied (see text for details)

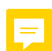

Supplement: Supplementary file [file hess-2020-26-RC2-supplement.pdf]
