# Supplementary material for: Technical Note: Evaluation and bias correction of an observations-based global runoff dataset using historical streamflow observations from small tropical catchments in the Philippines
Source: Copernicus journal article supplement (doi:10.5194/hess-2020-26), 2020-02-24

**Figure A1. Timeseries of GRUN predicted (red lines) observed (black lines) runoff values, and cross plots of predicted vs. observed values (note log-scales) with VE scores.**

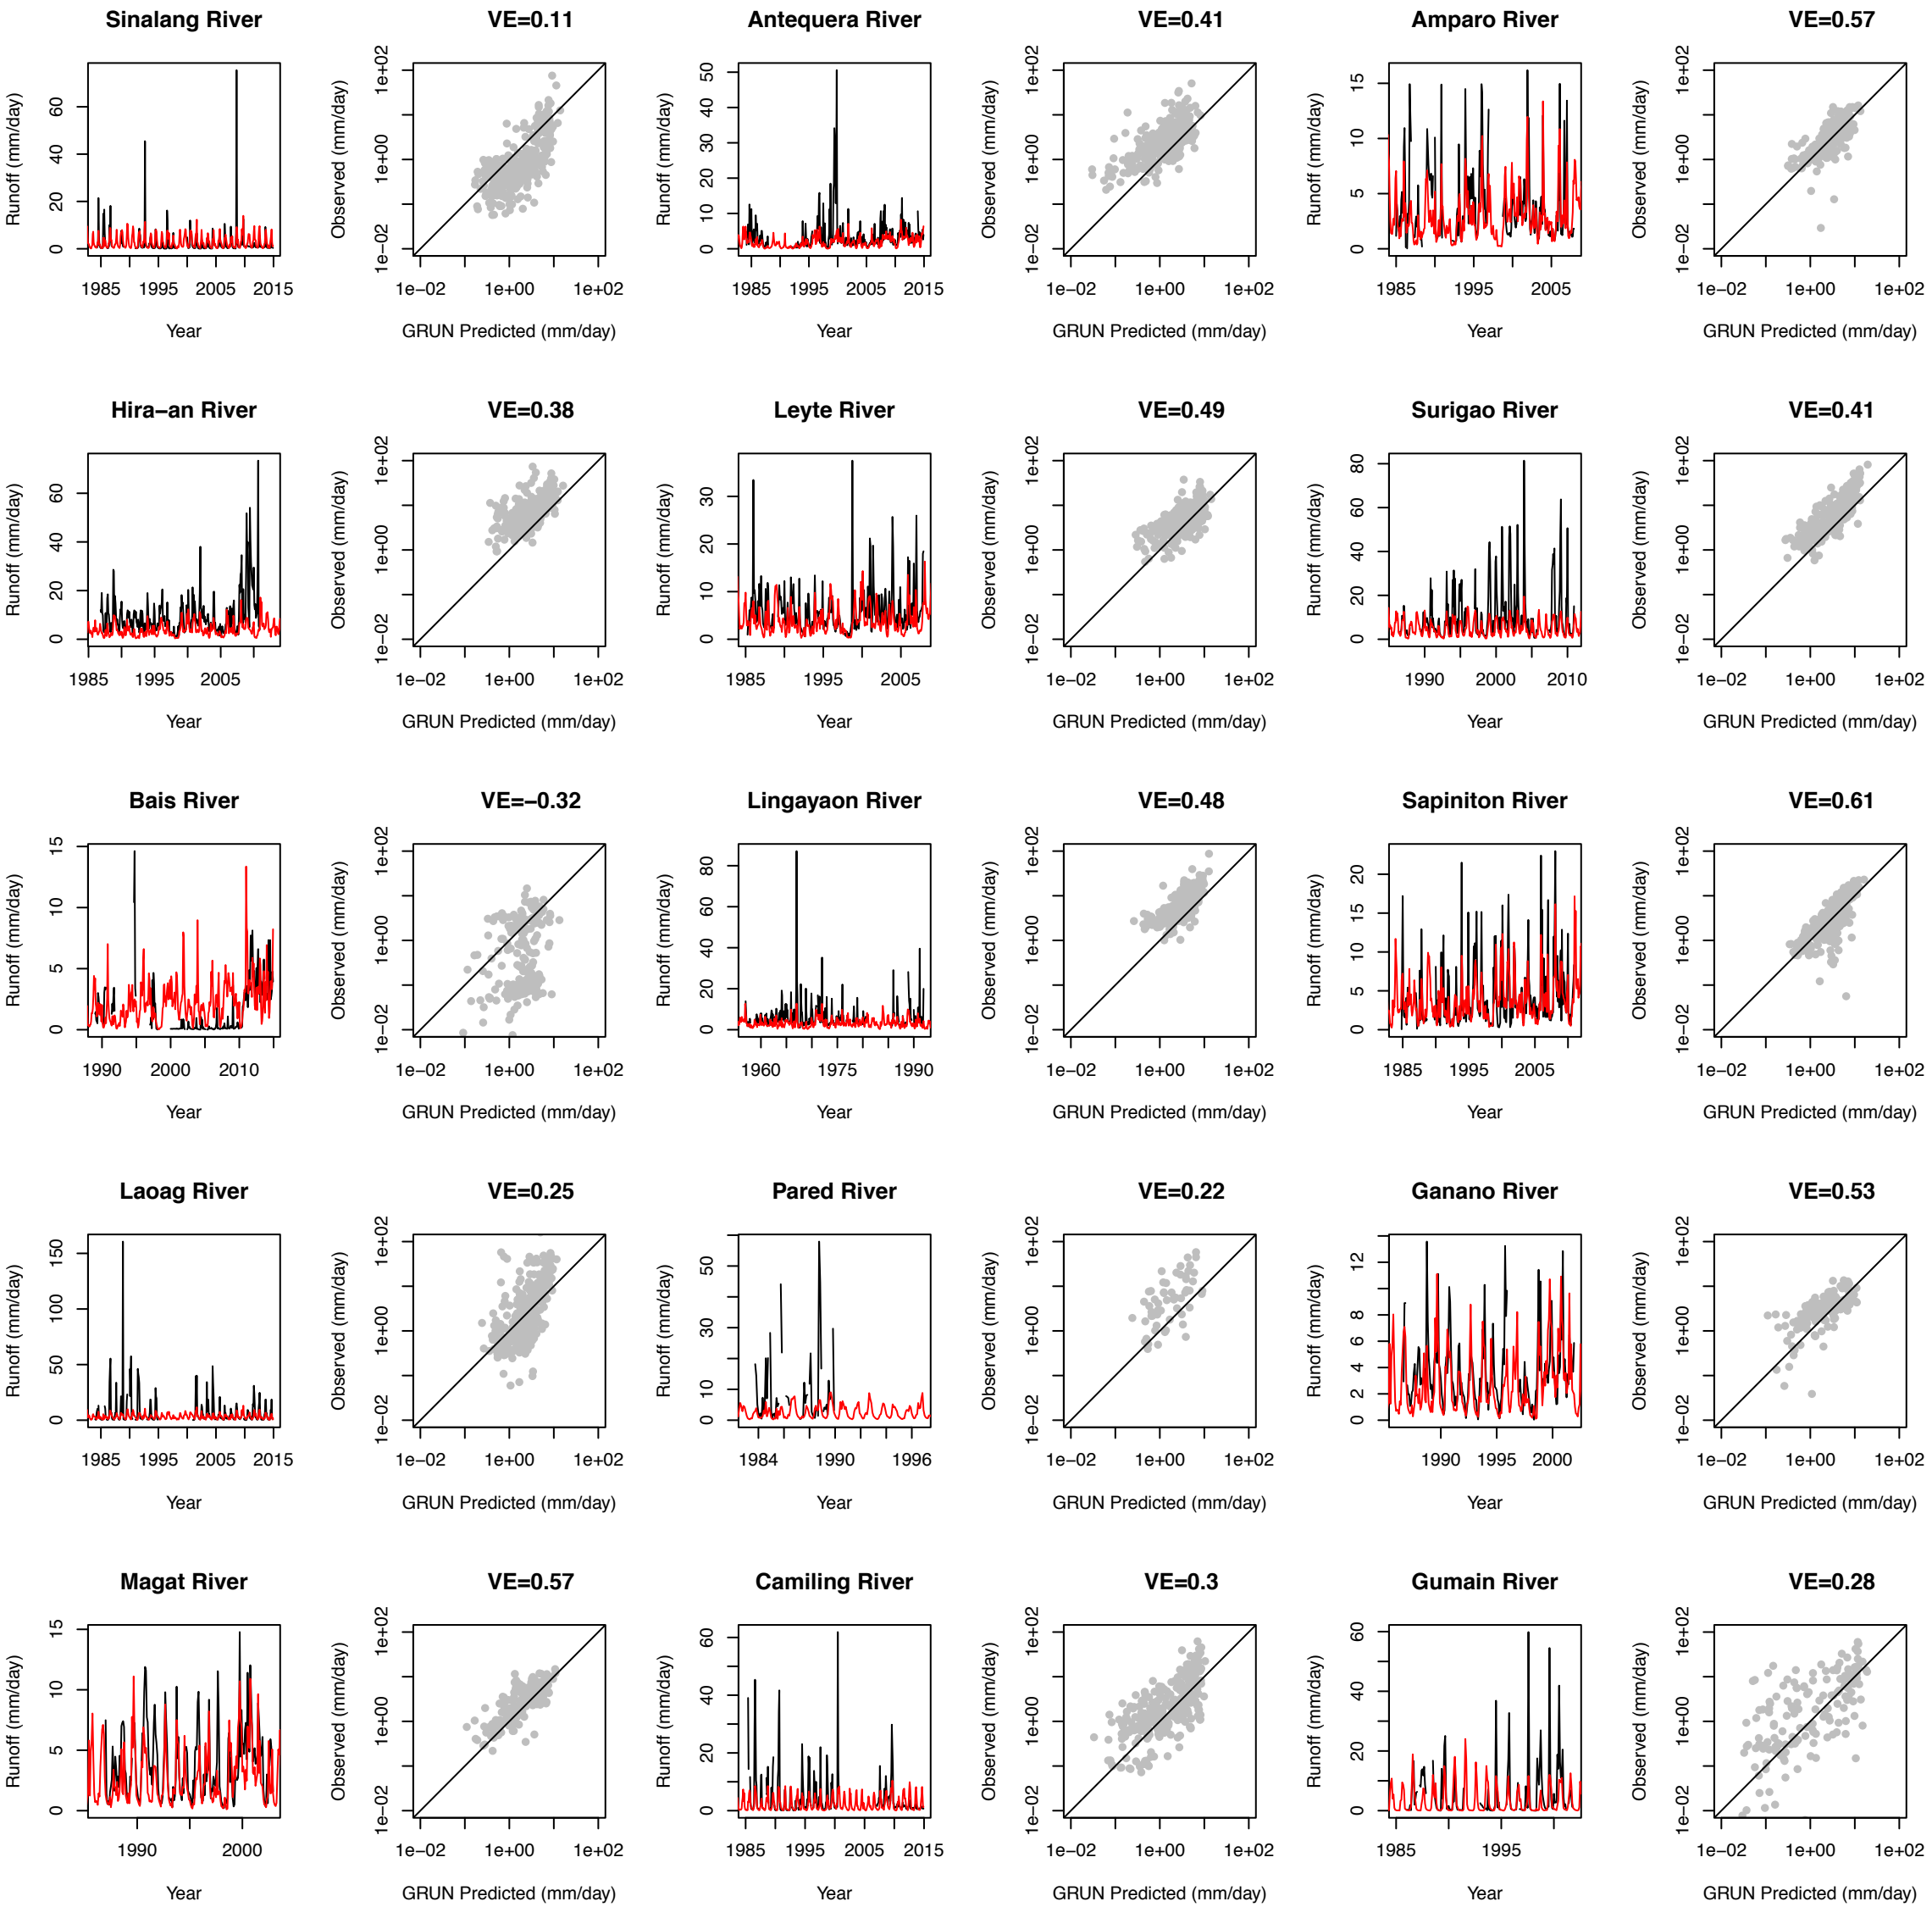

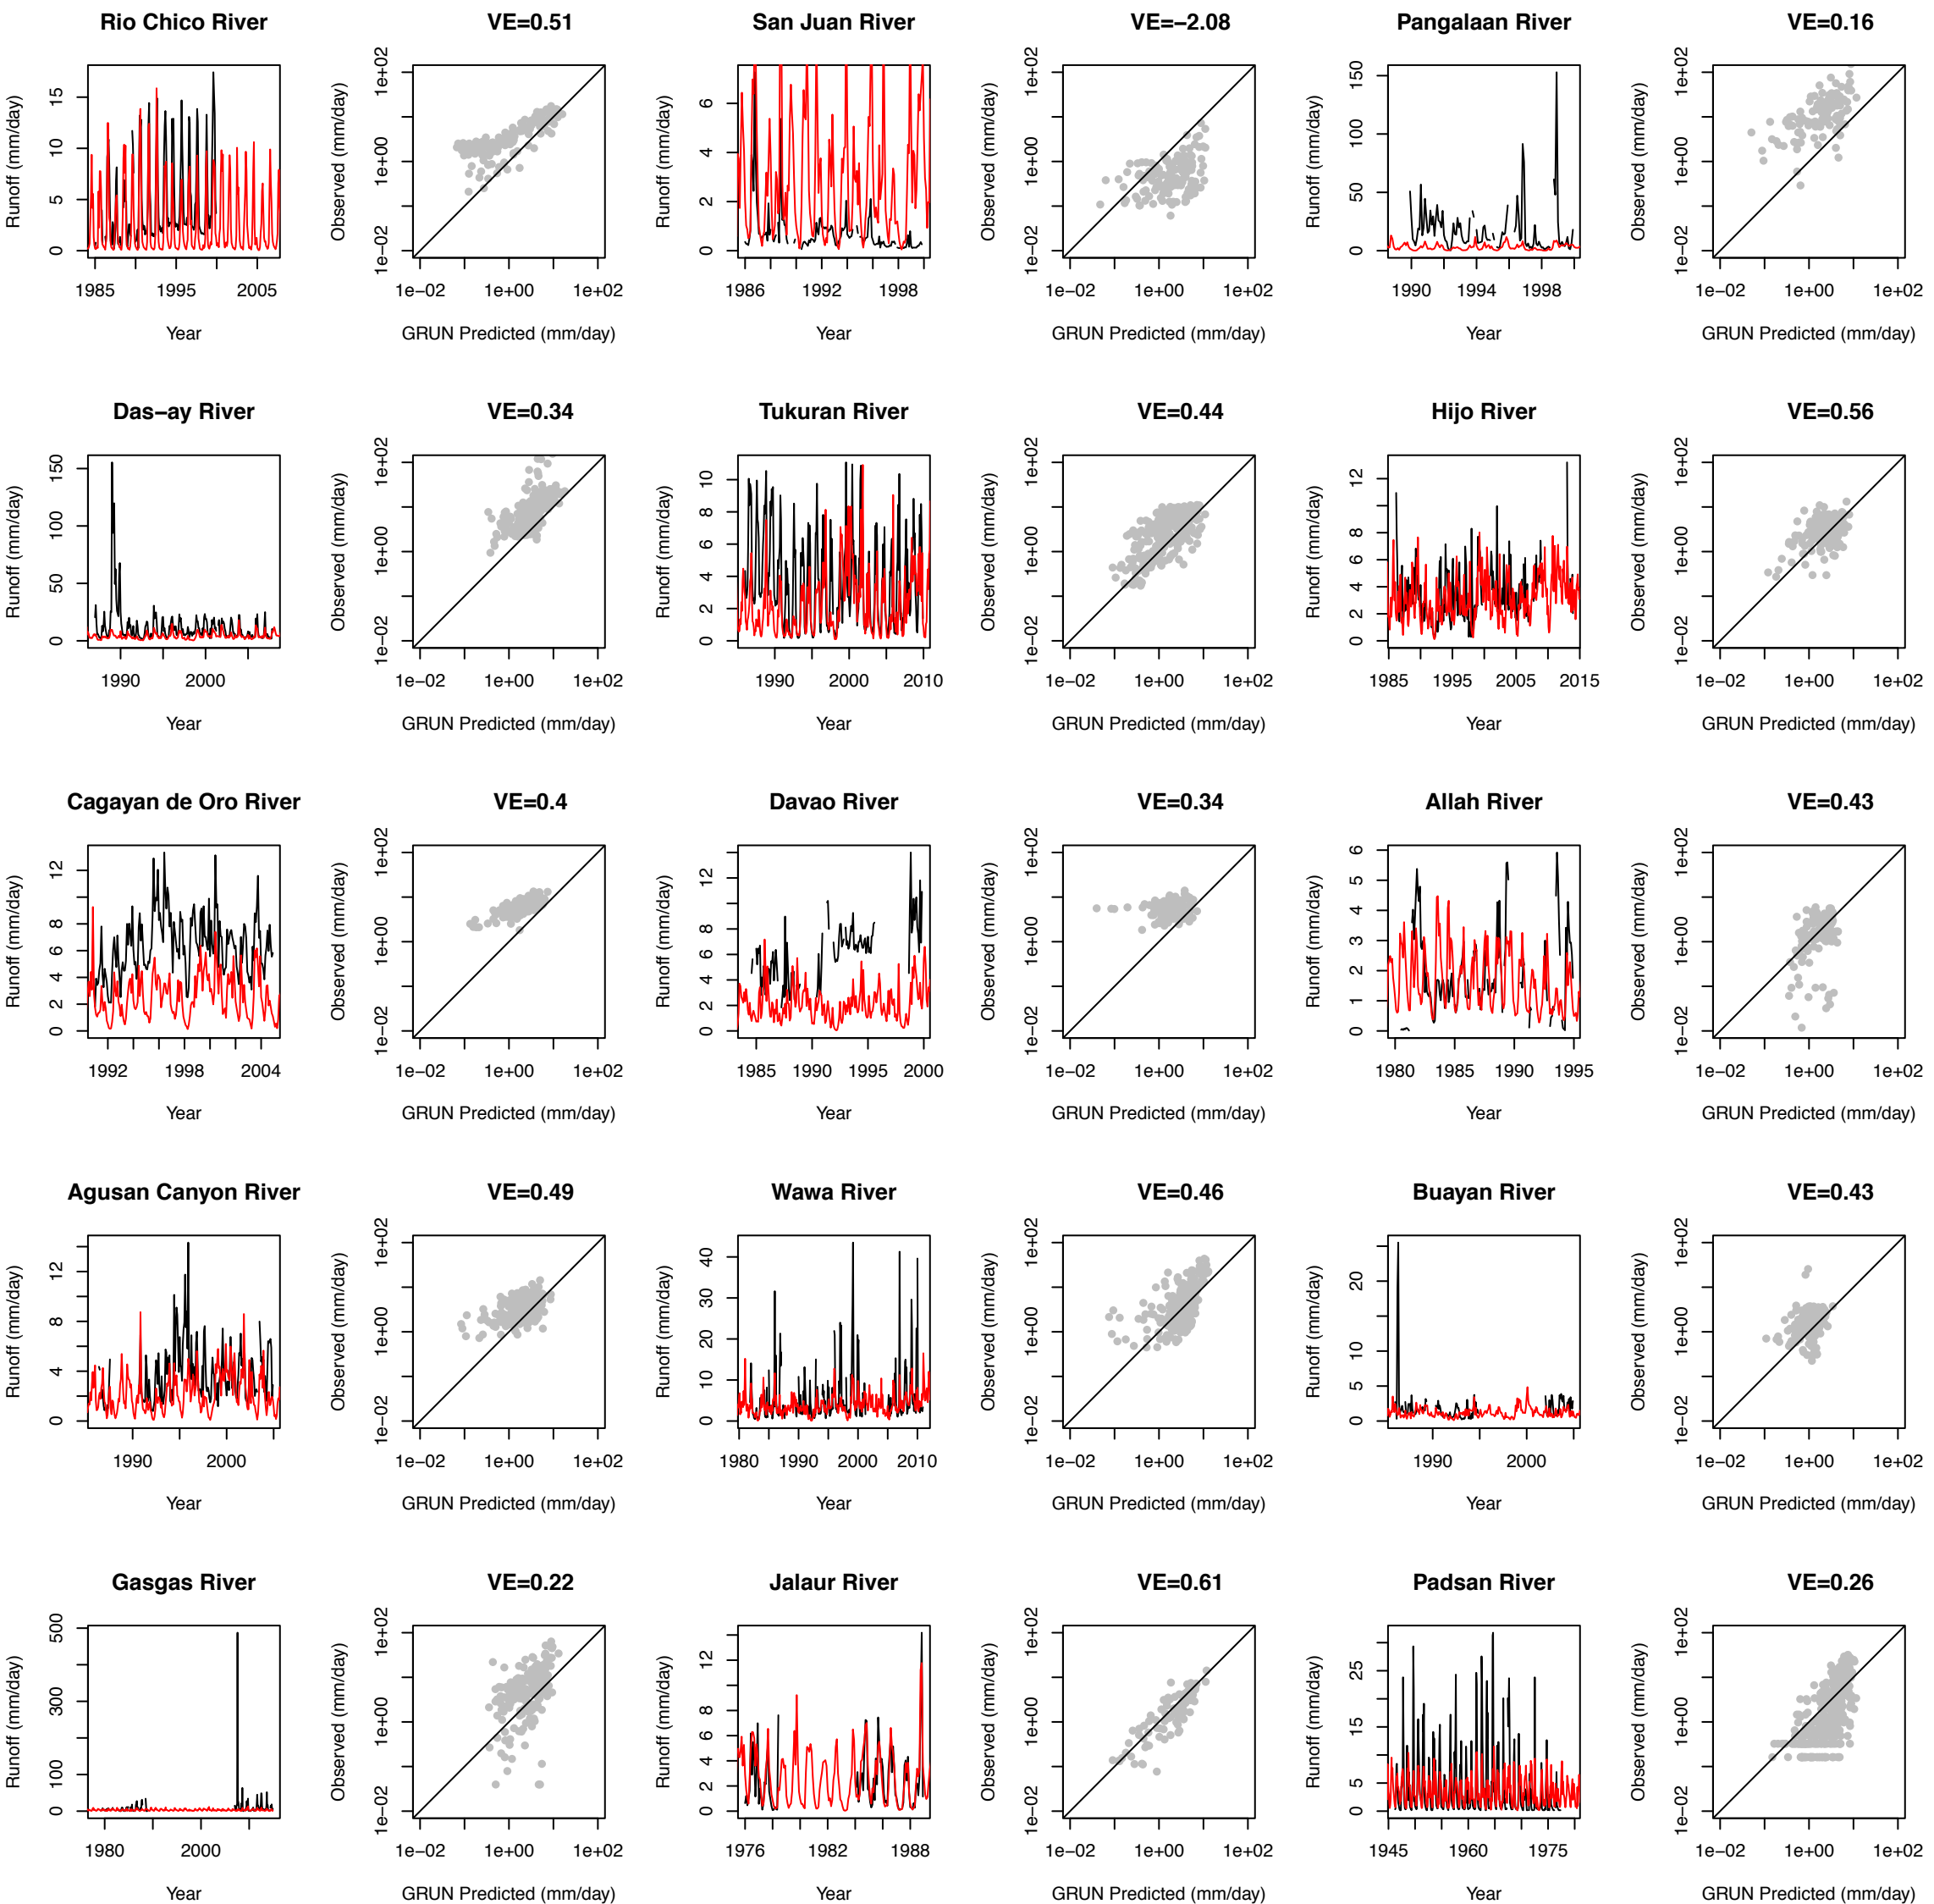

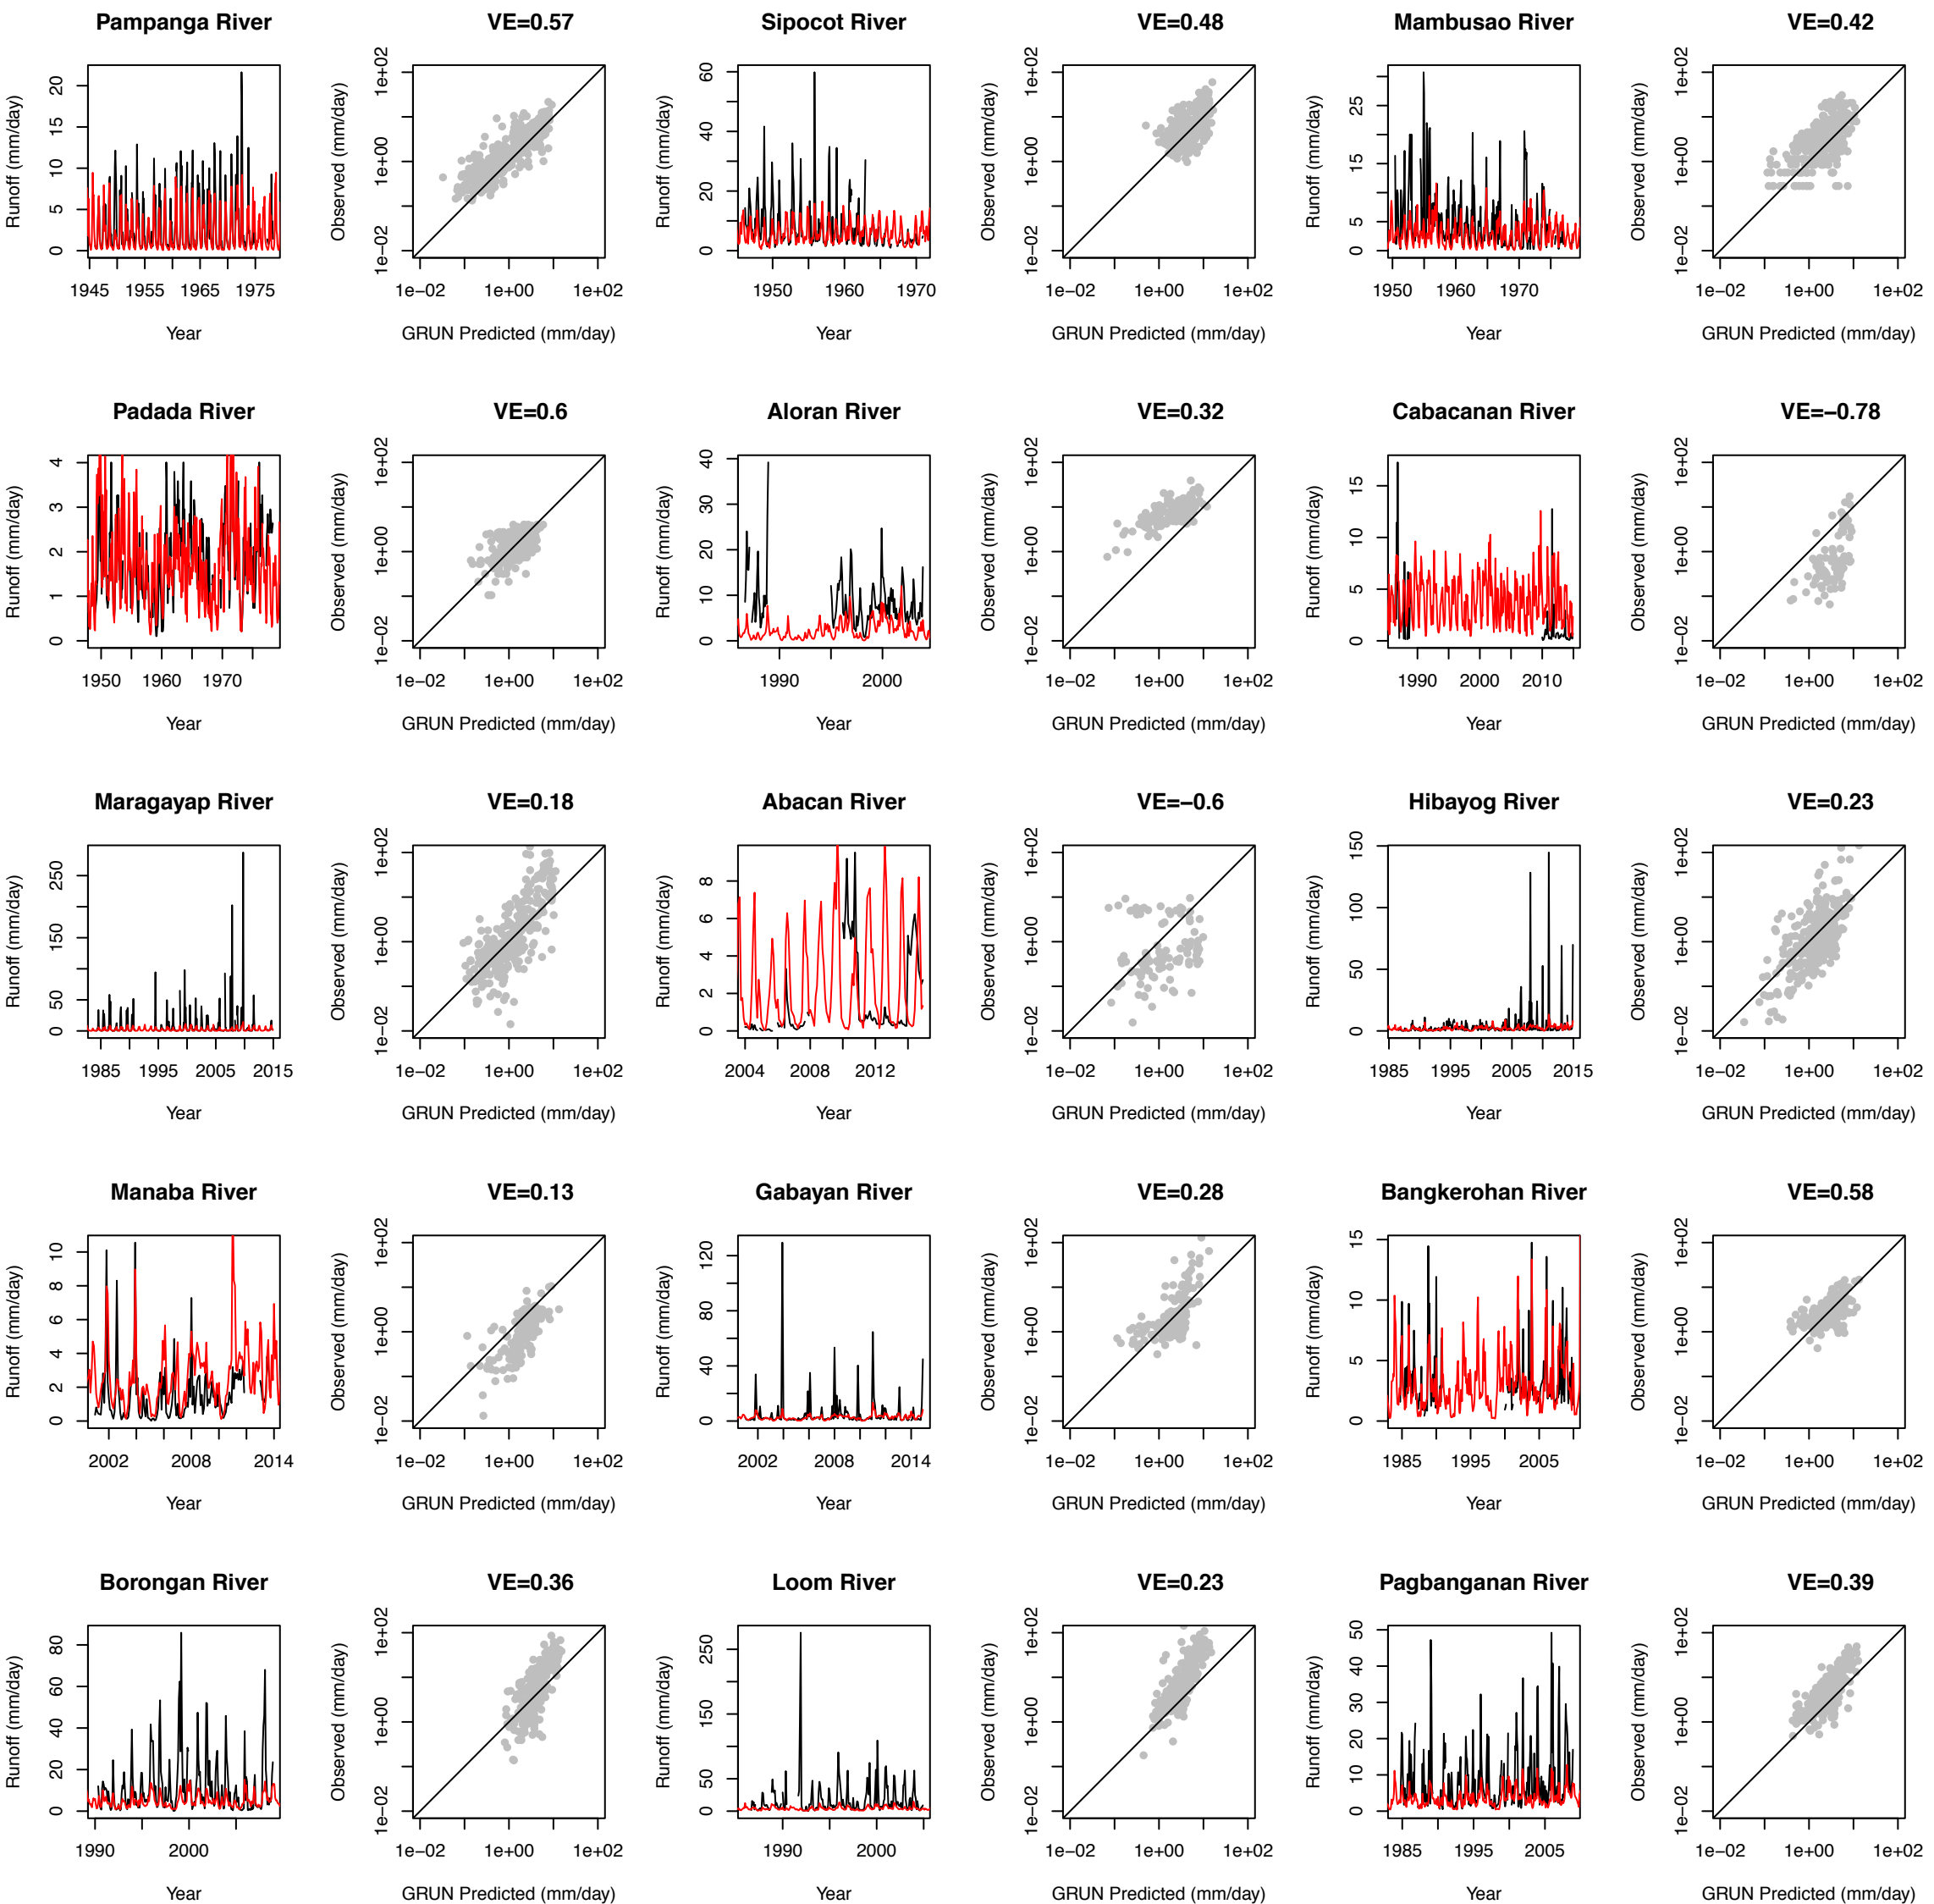

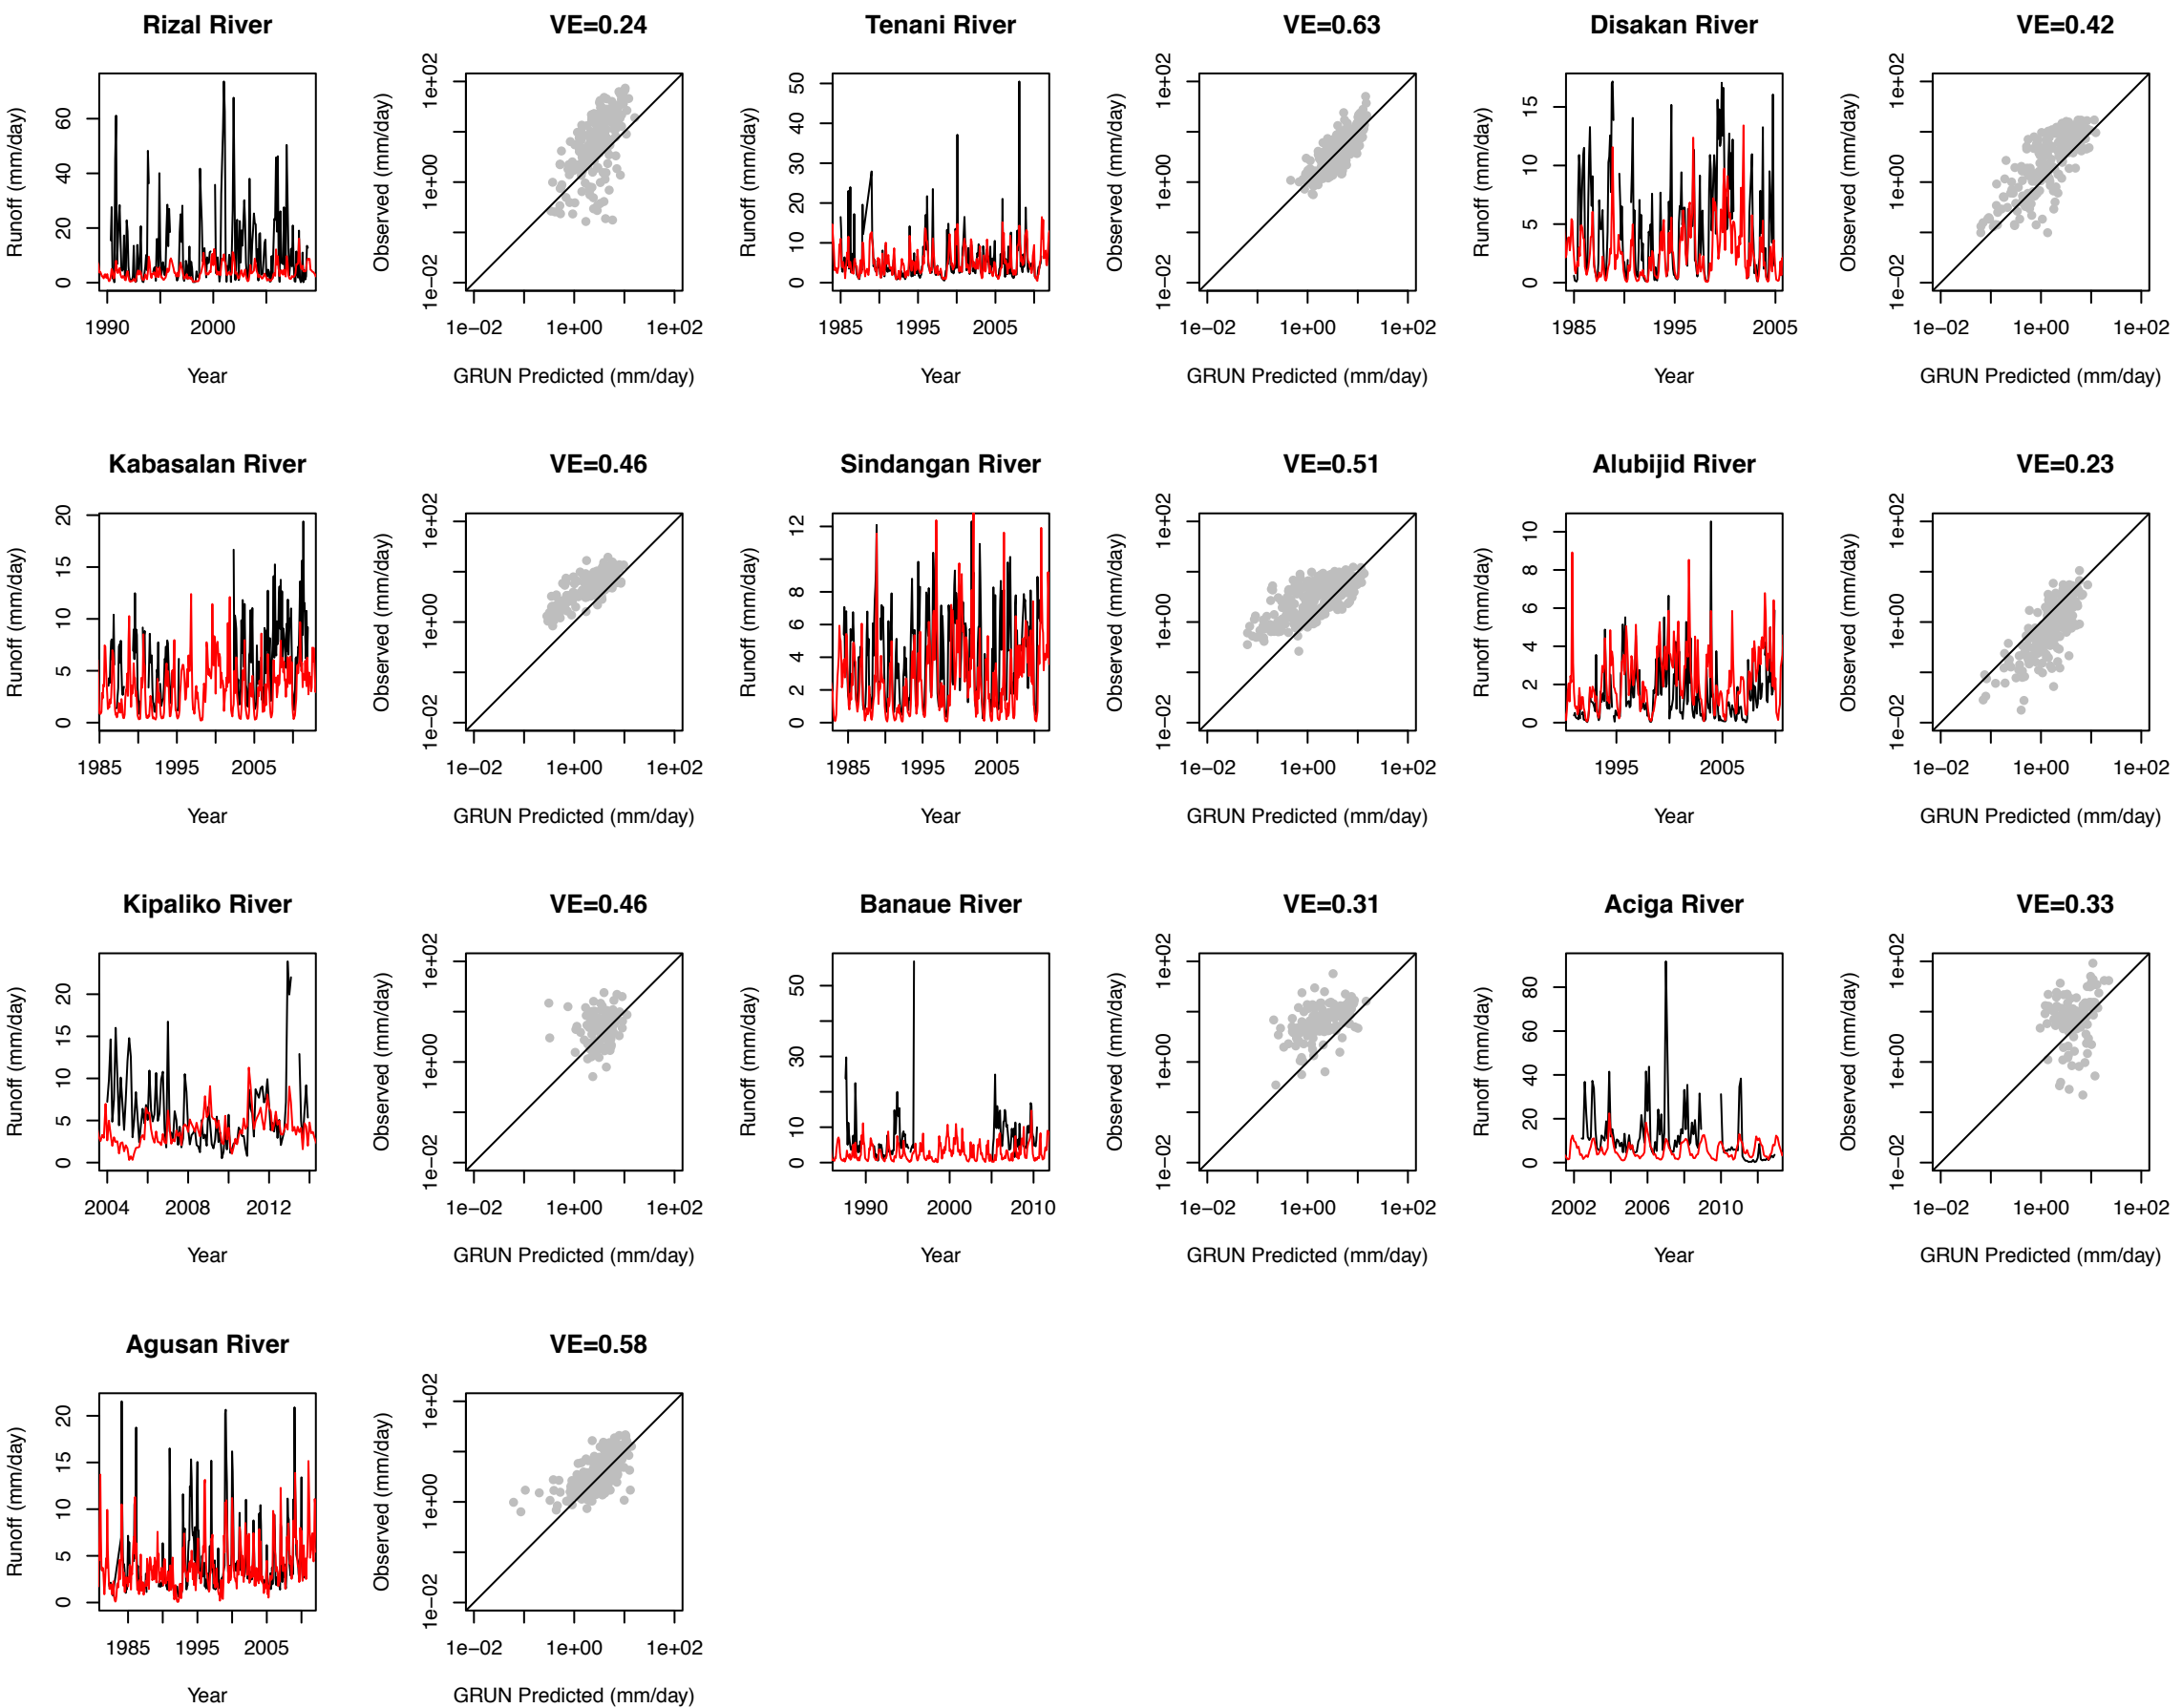

Supplement: Supplementary file 1 [file hess-2020-26-supplement.zip]
